# Supplementary material for: Opportunities and Limitations in the Analysis of Autistic Phenotypes - A Conceptual Review
Source: Preprints.org preprint supplement (doi:10.20944/preprints202203.0020.v1), 2022-03-01
Supplement: Supplementary file 1 [file supplementary]

## Sheet: I.A.1
		list according to publication year and citation number
		publ. Year	author	title	citation nr		publ. Year	author	title	citation nr		publ. Year	author	title	citation nr
		1998	Bailey, A.; Palferman, S.; Heavey, L.; Le Couteur, A.	Autism: The Phenotype in Relatives	630		2002	Klin, Ami; Jones, Warren; Schultz, Robert; Volkmar, Fred; Cohen, Donald	Defining and Quantifying the Social Phenotype in Autism	637		2002	Klin, Ami; Jones, Warren; Schultz, Robert; Volkmar, Fred; Cohen, Donald	Defining and Quantifying the Social Phenotype in Autism	637
		1998	Hollander, E., Cartwright, C., Wong, C. M., DeCaria, C. M., DelGiudice-Asch, G., Buchsbaum, M. S., & Aronowitz, B. R.	A Dimensional Approach to the Autism Spectrum	65		1998	Bailey, A.; Palferman, S.; Heavey, L.; Le Couteur, A.	Autism: The Phenotype in Relatives	630		1998	Bailey, A.; Palferman, S.; Heavey, L.; Le Couteur, A.	Autism: The Phenotype in Relatives	630
		2000	HAPPÉ, F.	The autistic spectrum: a guide for parents and professionals	1		2007	Dziuk, M. A., Larson, J. G., Apostu, A., Mahone, E. M., Denckla, M. B., & Mostofsky, S. H.	Dyspraxia in autism: association with motor, social, and communicative deficits	495		2007	Dziuk, M. A., Larson, J. G., Apostu, A., Mahone, E. M., Denckla, M. B., & Mostofsky, S. H.	Dyspraxia in autism: association with motor, social, and communicative deficits	495
		2001	Briskman, J.; Frith, U.; Happé, F.	Exploring the Cognitive Phenotype of Autism: Weak “Central Coherence” in Parents and Siblings of Children with Autism: II. Real-life Skills and Preferences	176		2001	Happé, F.; Frith, U.; Briskman, J.	Exploring the Cognitive Phenotype of Autism: Weak “Central Coherence” in Parents and Siblings of Children with Autism: I. Experimental Tests	435		2001	Happé, F.; Frith, U.; Briskman, J.	Exploring the Cognitive Phenotype of Autism: Weak “Central Coherence” in Parents and Siblings of Children with Autism: I. Experimental Tests	435
		2001	Lord, Catherine; Leventhal, Bennett L.; Cook, Edwin H.	Quantifying the phenotype in autism spectrum disorders	183		2007	Merin, Noah; Young, Gregory S.; Ozonoff, Sally; Rogers, Sally J.	Visual Fixation Patterns during Reciprocal Social Interaction Distinguish a Subgroup of 6-Month-Old Infants At-Risk for Autism from Comparison Infants	286		2007	Merin, Noah; Young, Gregory S.; Ozonoff, Sally; Rogers, Sally J.	Visual Fixation Patterns during Reciprocal Social Interaction Distinguish a Subgroup of 6-Month-Old Infants At-Risk for Autism from Comparison Infants	286
		2001	Happé, F.; Frith, U.; Briskman, J.	Exploring the Cognitive Phenotype of Autism: Weak “Central Coherence” in Parents and Siblings of Children with Autism: I. Experimental Tests	435		2010	Taylor, Julie Lounds; Seltzer, Marsha Mailick	Changes in the Autism Behavioral Phenotype During the Transition to Adulthood	285		2010	Taylor, Julie Lounds; Seltzer, Marsha Mailick	Changes in the Autism Behavioral Phenotype During the Transition to Adulthood	285
		2002	Klin, Ami; Jones, Warren; Schultz, Robert; Volkmar, Fred; Cohen, Donald	Defining and Quantifying the Social Phenotype in Autism	637		2012	Rice, Katherine; Moriuchi, Jennifer M.; Jones, Warren; Klin, Ami	Parsing Heterogeneity in Autism Spectrum Disorders: Visual Scanning of Dynamic Social Scenes in School-Aged Children	256		2012	Rice, Katherine; Moriuchi, Jennifer M.; Jones, Warren; Klin, Ami	Parsing Heterogeneity in Autism Spectrum Disorders: Visual Scanning of Dynamic Social Scenes in School-Aged Children	256
		2003	Mundy, Peter; Burnette, CP; Thorp, DM	Developmental psychopathology and the study of autism (vol 48, pg 96, 2003)	0		2011	Charman, T.; Jones, C. R. G.; Pickles, A.; Simonoff, E.; Baird, G.; Happé, F.	Defining the cognitive phenotype of autism	252		2011	Charman, T.; Jones, C. R. G.; Pickles, A.; Simonoff, E.; Baird, G.; Happé, F.	Defining the cognitive phenotype of autism	252
		2005	Riva, Daria; Bellugi, U.; Denckla, M. B.	Neurodevelopmental Disorders: Cognitive Behavioural Phenotypes	3		2011	Kopp, Svenny; Gillberg, Christopher	The Autism Spectrum Screening Questionnaire (ASSQ)-Revised Extended Version (ASSQ-REV): An instrument for better capturing the autism phenotype in girls? A preliminary study involving 191 clinical cases and community controls	210		2011	Kopp, Svenny; Gillberg, Christopher	The Autism Spectrum Screening Questionnaire (ASSQ)-Revised Extended Version (ASSQ-REV): An instrument for better capturing the autism phenotype in girls? A preliminary study involving 191 clinical cases and community controls	210
		2005	Beglinger, Leigh; Smith, Tristram	Concurrent Validity of Social Subtype and IQ after Early Intensive Behavioral Intervention in Children with Autism: A Preliminary Investigation	76		2005	Ozonoff, Sally; Williams, Brenda J.; Landa, Rebecca	Parental report of the early development of children with regressive autism: The delays-plus-regression phenotype	200		2005	Ozonoff, Sally; Williams, Brenda J.; Landa, Rebecca	Parental report of the early development of children with regressive autism: The delays-plus-regression phenotype	200
		2005	Ozonoff, Sally; Williams, Brenda J.; Landa, Rebecca	Parental report of the early development of children with regressive autism: The delays-plus-regression phenotype	200		2009	Goldman, Suzanne E.; Surdyka, Kyla; Cuevas, Ramon; Adkins, Karen; Wang, Lily; Malow, Beth A.	Defining the Sleep Phenotype in Children With Autism	190		2009	Goldman, Suzanne E.; Surdyka, Kyla; Cuevas, Ramon; Adkins, Karen; Wang, Lily; Malow, Beth A.	Defining the Sleep Phenotype in Children With Autism	190
		2006	Charman, Tony	Autism at the crossroads: determining the phenotype matters for neuroscience	6		2013	Georgiades, Stelios; Szatmari, Peter; Boyle, Michael; Hanna, Steven; Duku, Eric; Zwaigenbaum, Lonnie; Bryson, Susan; Fombonne, Eric; Volden, Joanne; Mirenda, Pat; Smith, Isabel; Roberts, Wendy; Vaillancourt, Tracy; Waddell, Charlotte; Bennett, Teresa; Thompson, Ann	Investigating phenotypic heterogeneity in children with autism spectrum disorder: a factor mixture modeling approach	190		2013	Georgiades, Stelios; Szatmari, Peter; Boyle, Michael; Hanna, Steven; Duku, Eric; Zwaigenbaum, Lonnie; Bryson, Susan; Fombonne, Eric; Volden, Joanne; Mirenda, Pat; Smith, Isabel; Roberts, Wendy; Vaillancourt, Tracy; Waddell, Charlotte; Bennett, Teresa; Thompson, Ann	Investigating phenotypic heterogeneity in children with autism spectrum disorder: a factor mixture modeling approach	190
		2006	Lord, Catherine; Spence, Sarah J.	Autism Spectrum Disorders: Phenotype and Diagnosis	86		2001	Lord, Catherine; Leventhal, Bennett L.; Cook, Edwin H.	Quantifying the phenotype in autism spectrum disorders	183		2001	Lord, Catherine; Leventhal, Bennett L.; Cook, Edwin H.	Quantifying the phenotype in autism spectrum disorders	183
		2007	Best, Catherine	The Boundaries of the Cognitive Phenotype of Autism: Social Cognition and Central Coherence in Young People with Autistic Traits and their First Degree Relatives	2		2008	Whitehouse, Andrew J. O.; Barry, Johanna G.; Bishop, Dorothy V. M.	Further defining the language impairment of autism: Is there a specific language impairment subtype?	181		2008	Whitehouse, Andrew J. O.; Barry, Johanna G.; Bishop, Dorothy V. M.	Further defining the language impairment of autism: Is there a specific language impairment subtype?	181
		2007	Yirmiya, Nurit; Ozonoff, Sally	The Very Early Autism Phenotype	89		2001	Briskman, J.; Frith, U.; Happé, F.	Exploring the Cognitive Phenotype of Autism: Weak “Central Coherence” in Parents and Siblings of Children with Autism: II. Real-life Skills and Preferences	176		2001	Briskman, J.; Frith, U.; Happé, F.	Exploring the Cognitive Phenotype of Autism: Weak “Central Coherence” in Parents and Siblings of Children with Autism: II. Real-life Skills and Preferences	176
		2007	Georgiades, STELIOS; Szatmari, PETER; Zwaigenbaum, LONNIE; Duku, ERIC; Bryson, SUSAN; Roberts, WENDY; Goldberg, JEREMY; Mahoney, WILLIAM	Structure of the Autism Symptom Phenotype: A Proposed Multidimensional Model	148		2008	Heaton, Pamela; Williams, Kerry; Cummins, Omar; Happé, Francesca	Autism and pitch processing splinter skills: A group and subgroup analysis	151		2008	Heaton, Pamela; Williams, Kerry; Cummins, Omar; Happé, Francesca	Autism and pitch processing splinter skills: A group and subgroup analysis	151
		2007	Merin, Noah; Young, Gregory S.; Ozonoff, Sally; Rogers, Sally J.	Visual Fixation Patterns during Reciprocal Social Interaction Distinguish a Subgroup of 6-Month-Old Infants At-Risk for Autism from Comparison Infants	286		2009	Jones, Warren; Klin, Ami	Heterogeneity and Homogeneity Across the Autism Spectrum: The Role of Development	149		2014	Baio, J.	Prevalence of autism spectrum disorder among children aged 8 years - autism and developmental disabilities monitoring network, 11 sites, United States, 2010	1281
		2007	Dziuk, M. A., Larson, J. G., Apostu, A., Mahone, E. M., Denckla, M. B., & Mostofsky, S. H.	Dyspraxia in autism: association with motor, social, and communicative deficits	495		2007	Georgiades, STELIOS; Szatmari, PETER; Zwaigenbaum, LONNIE; Duku, ERIC; Bryson, SUSAN; Roberts, WENDY; Goldberg, JEREMY; Mahoney, WILLIAM	Structure of the Autism Symptom Phenotype: A Proposed Multidimensional Model	148		2016	Bargiela, Sarah; Steward, Robyn; Mandy, William	The Experiences of Late-diagnosed Women with Autism Spectrum Conditions: An Investigation of the Female Autism Phenotype	439
		2008	Ring, Howard; Woodbury-Smith, Marc; Watson, Peter; Wheelwright, Sally; Baron-Cohen, Simon	Clinical heterogeneity among people with high functioning autism spectrum conditions: evidence favouring a continuous severity gradient	81		2012	Dowd, A. M., McGinley, J. L., Taffe, J. R., & Rinehart, N. J.	Do planning and visual integration difficulties underpin motor dysfunction in autism? A kinematic study of young children with autism	144		2017	Masi, Anne; DeMayo, Marilena M.; Glozier, Nicholas; Guastella, Adam J.	An Overview of Autism Spectrum Disorder, Heterogeneity and Treatment Options	401
		2008	Best, Catherine S.; Moffat, Vivien J.; Power, Michael J.; Owens, David G. C.; Johnstone, Eve C.	The Boundaries of the Cognitive Phenotype of Autism: Theory of Mind, Central Coherence and Ambiguous Figure Perception in Young People with Autistic Traits	114		2011	Jou, R. J.; Mateljevic, N.; Kaiser, M. D.; Sugrue, D. R.; Volkmar, F. R.; Pelphrey, K. A.	Structural Neural Phenotype of Autism: Preliminary Evidence from a Diffusion Tensor Imaging Study Using Tract-Based Spatial Statistics	139		2016	Constantino, J. N., & Charman, T.	Diagnosis of autism spectrum disorder: reconciling the syndrome, its diverse origins, and variation in expression	255
		2008	Gadow, Kenneth D.; DeVincent, Carla J.; Drabick, Deborah A. G.	Oppositional Defiant Disorder as a Clinical Phenotype in Children with Autism Spectrum Disorder	118		2011	Lane, A. E., Dennis, S. J., & Geraghty, M. E.	Brief Report: Further Evidence of Sensory Subtypes in Autism	129		2016	Pierce, Karen; Marinero, Steven; Hazin, Roxana; McKenna, Benjamin; Barnes, Cynthia Carter; Malige, Ajith	Eye Tracking Reveals Abnormal Visual Preference for Geometric Images as an Early Biomarker of an Autism Spectrum Disorder Subtype Associated With Increased Symptom Severity	210
		2008	Heaton, Pamela; Williams, Kerry; Cummins, Omar; Happé, Francesca	Autism and pitch processing splinter skills: A group and subgroup analysis	151		2008	Gadow, Kenneth D.; DeVincent, Carla J.; Drabick, Deborah A. G.	Oppositional Defiant Disorder as a Clinical Phenotype in Children with Autism Spectrum Disorder	118		2014	Pickles, Andrew; Anderson, Deborah K.; Lord, Catherine	Heterogeneity and plasticity in the development of language: a 17-year follow-up of children referred early for possible autism	170
		2008	Whitehouse, Andrew J. O.; Barry, Johanna G.; Bishop, Dorothy V. M.	Further defining the language impairment of autism: Is there a specific language impairment subtype?	181		2008	Best, Catherine S.; Moffat, Vivien J.; Power, Michael J.; Owens, David G. C.; Johnstone, Eve C.	The Boundaries of the Cognitive Phenotype of Autism: Theory of Mind, Central Coherence and Ambiguous Figure Perception in Young People with Autistic Traits	114		2015	Lundström, Sebastian; Reichenberg, Abraham; Anckarsäter, Henrik; Lichtenstein, Paul; Gillberg, Christopher	Autism phenotype versus registered diagnosis in Swedish children: prevalence trends over 10 years in general population samples	169
		2009	Kamp-Becker, Inge; Ghahreman, Mardjan; Smidt, Judith; Remschmidt, Helmut	Dimensional Structure of the Autism Phenotype: Relations Between Early Development and Current Presentation	55		2013	Georgiades, Stelios; Szatmari, Peter; Boyle, Michael	Importance of studying heterogeneity in autism	107		2014	Lane, A. E., Molloy, C. A., & Bishop, S. L.	Classification of Children With Autism Spectrum Disorder by Sensory Subtype: A Case for Sensory-Based Phenotypes	155
		2009	Jones, Warren; Klin, Ami	Heterogeneity and Homogeneity Across the Autism Spectrum: The Role of Development	149		2007	Yirmiya, Nurit; Ozonoff, Sally	The Very Early Autism Phenotype	89		2017	Haslbeck, J. M. B., & Fried, E. I.	How predictable are symptoms in psychopathological networks? A reanalysis of 18 published datasets	137
		2009	Goldman, Suzanne E.; Surdyka, Kyla; Cuevas, Ramon; Adkins, Karen; Wang, Lily; Malow, Beth A.	Defining the Sleep Phenotype in Children With Autism	190		2006	Lord, Catherine; Spence, Sarah J.	Autism Spectrum Disorders: Phenotype and Diagnosis	86		2016	Kim, So Hyun; Macari, Suzanne; Koller, Judah; Chawarska, Katarzyna	Examining the phenotypic heterogeneity of early autism spectrum disorder: subtypes and short-term outcomes	112
		2010	Eagle, Rose F.; Romanczyk, Raymond G.; Lenzenweger, Mark F.	Classification of children with autism spectrum disorders: A finite mixture modeling approach to heterogeneity	48		2012	Brown, S. M.; Bebko, J. M.	Generalization, overselectivity, and discrimination in the autism phenotype: A review	83		2016	Lehnhardt, Fritz-Georg; Falter, Christine Michaela; Gawronski, Astrid; Pfeiffer, Kathleen; Tepest, Ralf; Franklin, Jeremy; Vogeley, Kai	Sex-Related Cognitive Profile in Autism Spectrum Disorders Diagnosed Late in Life: Implications for the Female Autistic Phenotype	97
		2010	Taylor, Julie Lounds; Seltzer, Marsha Mailick	Changes in the Autism Behavioral Phenotype During the Transition to Adulthood	285		2008	Ring, Howard; Woodbury-Smith, Marc; Watson, Peter; Wheelwright, Sally; Baron-Cohen, Simon	Clinical heterogeneity among people with high functioning autism spectrum conditions: evidence favouring a continuous severity gradient	81		2016	Lombardo, Michael V.; Lai, Meng-Chuan; Auyeung, Bonnie; Holt, Rosemary J.; Allison, Carrie; Smith, Paula; Chakrabarti, Bhismadev; Ruigrok, Amber N. V.; Suckling, John; Bullmore, Edward T.; Bailey, Anthony J.; Baron-Cohen, Simon; Bolton, Patrick F.; Bullmore, Edward T.; Carrington, Sarah; Catani, Marco; Chakrabarti, Bhismadev; Craig, Michael C.; Daly, Eileen M.; Deoni, Sean C. L.; Ecker, Christine…	Unsupervised data-driven stratification of mentalizing heterogeneity in autism	92
		2011	Jou, R. J.; Mateljevic, N.; Kaiser, M. D.; Sugrue, D. R.; Volkmar, F. R.; Pelphrey, K. A.	Structural Neural Phenotype of Autism: Preliminary Evidence from a Diffusion Tensor Imaging Study Using Tract-Based Spatial Statistics	139		2005	Beglinger, Leigh; Smith, Tristram	Concurrent Validity of Social Subtype and IQ after Early Intensive Behavioral Intervention in Children with Autism: A Preliminary Investigation	76		2016	Randall, M., Sciberras, E., Brignell, A., Ihsen, E., Efron, D., Dissanayake, C., & Williams, K.	Autism spectrum disorder: Presentation and prevalence in a nationally representative Australian sample	82
		2011	Kopp, Svenny; Gillberg, Christopher	The Autism Spectrum Screening Questionnaire (ASSQ)-Revised Extended Version (ASSQ-REV): An instrument for better capturing the autism phenotype in girls? A preliminary study involving 191 clinical cases and community controls	210		1998	Hollander, E., Cartwright, C., Wong, C. M., DeCaria, C. M., DelGiudice-Asch, G., Buchsbaum, M. S., & Aronowitz, B. R.	A Dimensional Approach to the Autism Spectrum	65		2016	Becht, A. I., Nelemans, S. A., Branje, S. J., Vollebergh, W. A., Koot, H. M., Denissen, J. J., & Meeus, W. H.	The quest for identity in adolescence: heterogeneity in daily identity formation and psychosocial adjustment across 5 years	81
		2011	Charman, T.; Jones, C. R. G.; Pickles, A.; Simonoff, E.; Baird, G.; Happé, F.	Defining the cognitive phenotype of autism	252		2012	Lam, Yan Grace; Yeung, Siu Sze Susanna	Towards a convergent account of pragmatic language deficits in children with high-functioning autism: Depicting the phenotype using the Pragmatic Rating Scale	64		2018	Feczko, E., Balba, N. M., Miranda-Dominguez, O., Cordova, M., Karalunas, S. L., Irwin, L., ... & Fair, D. A.	Subtyping cognitive profiles in Autism Spectrum Disorder using a Functional Random Forest algorithm	72
		2011	Lane, A. E., Dennis, S. J., & Geraghty, M. E.	Brief Report: Further Evidence of Sensory Subtypes in Autism	129		2009	Kamp-Becker, Inge; Ghahreman, Mardjan; Smidt, Judith; Remschmidt, Helmut	Dimensional Structure of the Autism Phenotype: Relations Between Early Development and Current Presentation	55		2014	Lucas, Rebecca; Norbury, Courtenay Frazier	Levels of Text Comprehension in Children with Autism Spectrum Disorders (ASD): The Influence of Language Phenotype	63
		2012	Gebregziabher, Mulugeta; Shotwell, Matthew S.; Charles, Jane M.; Nicholas, Joyce S.	Comparison of methods for identifying phenotype subgroups using categorical features data with application to autism spectrum disorder	3		2010	Eagle, Rose F.; Romanczyk, Raymond G.; Lenzenweger, Mark F.	Classification of children with autism spectrum disorders: A finite mixture modeling approach to heterogeneity	48		2014	Ankenman, K., Elgin, J., Sullivan, K., Vincent, L., & Bernier, R.	Nonverbal and Verbal Cognitive Discrepancy Profiles in Autism Spectrum Disorders: Influence of Age and Gender	59
		2012	Bennett, Emily; Heaton, Pamela	Is Talent in Autism Spectrum Disorders Associated with a Specific Cognitive and Behavioural Phenotype?	41		2012	Bennett, Emily; Heaton, Pamela	Is Talent in Autism Spectrum Disorders Associated with a Specific Cognitive and Behavioural Phenotype?	41		2017	Uljarević, M., Baranek, G., Vivanti, G., Hedley, D., Hudry, K., & Lane, A.	Heterogeneity of sensory features in autism spectrum disorder: Challenges and perspectives for future research	52
		2012	Lam, Yan Grace; Yeung, Siu Sze Susanna	Towards a convergent account of pragmatic language deficits in children with high-functioning autism: Depicting the phenotype using the Pragmatic Rating Scale	64		2013	Torres, Elizabeth; Isenhower, Robert; Yanovich, Polina; Rehrig, Gwendolyn; Stigler, Kimberly; Nurnberger, John; Jose, Jorge	Strategies to develop putative biomarkers to characterize the female phenotype with Autism Spectrum Disorders	22		2017	DeBoth, K. K., & Reynolds, S.	A systematic review of sensory-based autism subtypes	48
		2012	Brown, S. M.; Bebko, J. M.	Generalization, overselectivity, and discrimination in the autism phenotype: A review	83		2013	Duku, Eric; Szatmari, Peter; Vaillancourt, Tracy; Georgiades, Stelios; Thompson, Ann; Liu, Xiao-Qing; Paterson, Andrew D.; Bennett, Terry	Measurement equivalence of the autism symptom phenotype in children and youth	13		2014	McCray, Alexa T.; Trevvett, Philip; Frost, H. Robert	Modeling the Autism Spectrum Disorder Phenotype	44
		2012	Rice, Katherine; Moriuchi, Jennifer M.; Jones, Warren; Klin, Ami	Parsing Heterogeneity in Autism Spectrum Disorders: Visual Scanning of Dynamic Social Scenes in School-Aged Children	256		2013	Hassanpour, Saeed; O’Connor, Martin J.; Das, Amar K.	A semantic-based method for extracting concept definitions from scientific publications: evaluation in the autism phenotype domain	13		2019	Lombardo, Michael V.; Lai, Meng-Chuan; Baron-Cohen, Simon	Big data approaches to decomposing heterogeneity across the autism spectrum	155
		2012	Dowd, A. M., McGinley, J. L., Taffe, J. R., & Rinehart, N. J.	Do planning and visual integration difficulties underpin motor dysfunction in autism? A kinematic study of young children with autism	144		2013	Lam, Yan Grace	Re-examining the cognitive phenotype in autism: A study with young Chinese children	11		2019	Pierce, Karen; Gazestani, Vahid H.; Bacon, Elizabeth; Barnes, Cynthia Carter; Cha, Debra; Nalabolu, Srinivasa; Lopez, Linda; Moore, Adrienne; Pence-Stophaeros, Sunny; Courchesne, Eric	Evaluation of the Diagnostic Stability of the Early Autism Spectrum Disorder Phenotype in the General Population Starting at 12 Months	115
		2013	Wong, Virginia; Fung, Cecilia; Wong, Polly	Use of Dysmorphology for Subgroup Classification on Autism Spectrum Disorder in Chinese Children	1		2006	Charman, Tony	Autism at the crossroads: determining the phenotype matters for neuroscience	6		2019	Feczko, E., Miranda-Dominguez, O., Marr, M., Graham, A. M., Nigg, J. T., & Fair, D. A.	The Heterogeneity Problem: Approaches to Identify Psychiatric Subtypes	86
		2013	Lam, Yan Grace	Re-examining the cognitive phenotype in autism: A study with young Chinese children	11		2005	Riva, Daria; Bellugi, U.; Denckla, M. B.	Neurodevelopmental Disorders: Cognitive Behavioural Phenotypes	3		2019	Wolfers, Thomas; Floris, Dorothea L.; Dinga, Richard; van Rooij, Daan; Isakoglou, Christina; Kia, Seyed Mostafa; Zabihi, Mariam; Llera, Alberto; Chowdanayaka, Rajanikanth; Kumar, Vinod J.; Peng, Han; Laidi, Charles; Batalle, Dafnis; Dimitrova, Ralica; Charman, Tony; Loth, Eva; Lai, Meng-Chuan; Jones, Emily; Baumeister, Sarah; Moessnang, Carolin; Banaschewski, Tobias; Ecker, Christine; Dumas, Guil…	From pattern classification to stratification: towards conceptualizing the heterogeneity of Autism Spectrum Disorder	36
		2013	Duku, Eric; Szatmari, Peter; Vaillancourt, Tracy; Georgiades, Stelios; Thompson, Ann; Liu, Xiao-Qing; Paterson, Andrew D.; Bennett, Terry	Measurement equivalence of the autism symptom phenotype in children and youth	13		2012	Gebregziabher, Mulugeta; Shotwell, Matthew S.; Charles, Jane M.; Nicholas, Joyce S.	Comparison of methods for identifying phenotype subgroups using categorical features data with application to autism spectrum disorder	3		2019	Stevens, E., Dixon, D. R., Novack, M. N., Granpeesheh, D., Smith, T., & Linstead, E.	Identification and analysis of behavioral phenotypes in autism spectrum disorder via unsupervised machine learning	27
		2013	Hassanpour, Saeed; O’Connor, Martin J.; Das, Amar K.	A semantic-based method for extracting concept definitions from scientific publications: evaluation in the autism phenotype domain	13		2007	Best, Catherine	The Boundaries of the Cognitive Phenotype of Autism: Social Cognition and Central Coherence in Young People with Autistic Traits and their First Degree Relatives	2		2019	Boorse, Jaclin; Cola, Meredith; Plate, Samantha; Yankowitz, Lisa; Pandey, Juhi; Schultz, Robert T.; Parish-Morris, Julia	Linguistic markers of autism in girls: evidence of a “blended phenotype” during storytelling	24
		2013	Torres, Elizabeth; Isenhower, Robert; Yanovich, Polina; Rehrig, Gwendolyn; Stigler, Kimberly; Nurnberger, John; Jose, Jorge	Strategies to develop putative biomarkers to characterize the female phenotype with Autism Spectrum Disorders	22		2000	HAPPÉ, F.	The autistic spectrum: a guide for parents and professionals	1		2019	Kim, Hyunsik; Keifer, Cara; Rodriguez-Seijas, Craig; Eaton, Nicholas; Lerner, Matthew; Gadow, Kenneth	Quantifying the Optimal Structure of the Autism Phenotype: A Comprehensive Comparison of Dimensional, Categorical, and Hybrid Models	22
		2013	Georgiades, Stelios; Szatmari, Peter; Boyle, Michael	Importance of studying heterogeneity in autism	107		2013	Wong, Virginia; Fung, Cecilia; Wong, Polly	Use of Dysmorphology for Subgroup Classification on Autism Spectrum Disorder in Chinese Children	1		2019	Kim, H., Keifer, C., Rodriguez-Seijas, C., Eaton, N., Lerner, M., & Gadow, K.	Quantifying the optimal structure of the autism phenotype: A comprehensive comparison of dimensional, categorical, and hybrid models	22
		2013	Georgiades, Stelios; Szatmari, Peter; Boyle, Michael; Hanna, Steven; Duku, Eric; Zwaigenbaum, Lonnie; Bryson, Susan; Fombonne, Eric; Volden, Joanne; Mirenda, Pat; Smith, Isabel; Roberts, Wendy; Vaillancourt, Tracy; Waddell, Charlotte; Bennett, Teresa; Thompson, Ann	Investigating phenotypic heterogeneity in children with autism spectrum disorder: a factor mixture modeling approach	190		2003	Mundy, Peter; Burnette, CP; Thorp, DM	Developmental psychopathology and the study of autism (vol 48, pg 96, 2003)	0		2020	Mottron, Laurent; Bzdok, Danilo	Autism spectrum heterogeneity: fact or artifact?	46
		2014	Hu, Valerie W.	Phenotype Definition: A Cornerstone of Autism Research, Diagnosis and Therapy	2		2014	Baio, J.	Prevalence of autism spectrum disorder among children aged 8 years - autism and developmental disabilities monitoring network, 11 sites, United States, 2010	1281		2020	Tang, Siyi; Sun, Nanbo; Floris, Dorothea L.; Zhang, Xiuming; Di Martino, Adriana; Yeo, B. T. Thomas	Reconciling Dimensional and Categorical Models of Autism Heterogeneity: A Brain Connectomics and Behavioral Study	30
		2014	McCray, Alexa T.; Trevvett, Philip; Frost, H. Robert	Modeling the Autism Spectrum Disorder Phenotype	44		2016	Bargiela, Sarah; Steward, Robyn; Mandy, William	The Experiences of Late-diagnosed Women with Autism Spectrum Conditions: An Investigation of the Female Autism Phenotype	439		2020	Tang, S., Sun, N., Floris, D. L., Zhang, X., Di Martino, A., & Yeo, B. T.	Reconciling Dimensional and Categorical Models of Autism Heterogeneity: A Brain Connectomics and Behavioral Study	30
		2014	Lucas, Rebecca; Norbury, Courtenay Frazier	Levels of Text Comprehension in Children with Autism Spectrum Disorders (ASD): The Influence of Language Phenotype	63		2017	Masi, Anne; DeMayo, Marilena M.; Glozier, Nicholas; Guastella, Adam J.	An Overview of Autism Spectrum Disorder, Heterogeneity and Treatment Options	401		2020	Kang, Erin; Gadow, Kenneth D.; Lerner, Matthew D.	Atypical Communication Characteristics, Differential Diagnosis, and the Autism Spectrum Disorder Phenotype in Youth	12
		2014	Pickles, Andrew; Anderson, Deborah K.; Lord, Catherine	Heterogeneity and plasticity in the development of language: a 17-year follow-up of children referred early for possible autism	170		2016	Constantino, J. N., & Charman, T.	Diagnosis of autism spectrum disorder: reconciling the syndrome, its diverse origins, and variation in expression	255		2020	McCormick, Carolyn E. B.; Kavanaugh, Brian C.; Sipsock, Danielle; Righi, Giulia; Oberman, Lindsay M.; Luca, Daniel Moreno De; Uzun, Ece D. Gamsiz; Best, Carrie R.; Jerskey, Beth A.; Quinn, Joanne G.; Jewel, Susan B.; Wu, Pei-Chi; McLean, Rebecca L.; Levine, Todd P.; Tokadjian, Hasmik; Perkins, Kayla A.; Clarke, Elaine B.; Dunn, Brittany; Gerber, Alan H.; Tenenbaum, Elena J.; Anders, Thomas F.; Sh…	Autism Heterogeneity in a Densely Sampled U.S. Population: Results From the First 1,000 Participants in the RI-CART Study	10
		2014	Lane, A. E., Molloy, C. A., & Bishop, S. L.	Classification of Children With Autism Spectrum Disorder by Sensory Subtype: A Case for Sensory-Based Phenotypes	155		2016	Pierce, Karen; Marinero, Steven; Hazin, Roxana; McKenna, Benjamin; Barnes, Cynthia Carter; Malige, Ajith	Eye Tracking Reveals Abnormal Visual Preference for Geometric Images as an Early Biomarker of an Autism Spectrum Disorder Subtype Associated With Increased Symptom Severity	210		2020	Baadel, S., Thabtah, F., & Lu, J.	A clustering approach for autistic trait classification	8
		2014	Ankenman, K., Elgin, J., Sullivan, K., Vincent, L., & Bernier, R.	Nonverbal and Verbal Cognitive Discrepancy Profiles in Autism Spectrum Disorders: Influence of Age and Gender	59		2014	Pickles, Andrew; Anderson, Deborah K.; Lord, Catherine	Heterogeneity and plasticity in the development of language: a 17-year follow-up of children referred early for possible autism	170		2020	Uljarević, M., Phillips, J. M., Schuck, R. K., Schapp, S., Solomon, E. M., Salzman, E., ... & Hardan, A. Y.	Exploring Social Subtypes in Autism Spectrum Disorder: A Preliminary Study	6
		2014	Baio, J.	Prevalence of autism spectrum disorder among children aged 8 years - autism and developmental disabilities monitoring network, 11 sites, United States, 2010	1281		2015	Lundström, Sebastian; Reichenberg, Abraham; Anckarsäter, Henrik; Lichtenstein, Paul; Gillberg, Christopher	Autism phenotype versus registered diagnosis in Swedish children: prevalence trends over 10 years in general population samples	169		2020	Tillmann, J.; Uljarevic, M.; Crawley, D.; Dumas, G.; Loth, E.; Murphy, D.; Buitelaar, J.; Charman, T.; Ahmad, Jumana; Ambrosino, Sara; Auyeung, Bonnie; Baumeister, Sarah; Beckmann, Christian; Bourgeron, Thomas; Bours, Carsten; Brammer, Michael; Brandeis, Daniel; Brogna, Claudia; de Bruijn, Yvette; Chakrabarti, Bhismadev; Cornelissen, Ineke; Acqua, Flavio Dell’; Dumas, Guillaume; Ecker, Christine;…	Dissecting the phenotypic heterogeneity in sensory features in autism spectrum disorder: a factor mixture modelling approach	5
		2015	Kotsopoulos, S	[Early diagnosis of autism: Phenotype-endophenotype]	6		2014	Lane, A. E., Molloy, C. A., & Bishop, S. L.	Classification of Children With Autism Spectrum Disorder by Sensory Subtype: A Case for Sensory-Based Phenotypes	155		2020	Narita, Akira; Nagai, Masato; Mizuno, Satoshi; Ogishima, Soichi; Tamiya, Gen; Ueki, Masao; Sakurai, Rieko; Makino, Satoshi; Obara, Taku; Ishikuro, Mami; Yamanaka, Chizuru; Matsubara, Hiroko; Kuniyoshi, Yasutaka; Murakami, Keiko; Ueno, Fumihiko; Noda, Aoi; Kobayashi, Tomoko; Kobayashi, Mika; Usuzaki, Takuma; Ohseto, Hisashi; Hozawa, Atsushi; Kikuya, Masahiro; Metoki, Hirohito; Kure, Shigeo; Kuriya…	Clustering by phenotype and genome-wide association study in autism	5
		2015	Obafemi-Ajayi, Tayo; Lam, Dao; Takahashi, T. Nicole; Kanne, Stephen; Wunsch, Donald	Sorting the phenotypic heterogeneity of autism spectrum disorders: A hierarchical clustering model	11		2017	Haslbeck, J. M. B., & Fried, E. I.	How predictable are symptoms in psychopathological networks? A reanalysis of 18 published datasets	137		2020	Uljarević, Mirko; Cooper, Matthew N.; Bebbington, Keely; Glasson, Emma J.; Maybery, Murray T.; Varcin, Kandice; Alvares, Gail A.; Wray, John; Leekam, Susan R.; Whitehouse, Andrew J. O.	Deconstructing the repetitive behaviour phenotype in autism spectrum disorder through a large population-based analysis	3
		2015	Tager-Flusberg, Helen	Defining language impairments in a subgroup of children with autism spectrum disorder	38		2016	Kim, So Hyun; Macari, Suzanne; Koller, Judah; Chawarska, Katarzyna	Examining the phenotypic heterogeneity of early autism spectrum disorder: subtypes and short-term outcomes	112		2021	Geurts, Hilde M.; Rentergem, Joost A. Agelink van; Radhoe, Tulsi; Torenvliet, Carolien; Putten, Wikke J. Van der; Groenman, Annabeth P.	Ageing and heterogeneity regarding autism spectrum conditions: a protocol paper of an accelerated longitudinal study	2
		2015	Lundström, Sebastian; Reichenberg, Abraham; Anckarsäter, Henrik; Lichtenstein, Paul; Gillberg, Christopher	Autism phenotype versus registered diagnosis in Swedish children: prevalence trends over 10 years in general population samples	169		2016	Lehnhardt, Fritz-Georg; Falter, Christine Michaela; Gawronski, Astrid; Pfeiffer, Kathleen; Tepest, Ralf; Franklin, Jeremy; Vogeley, Kai	Sex-Related Cognitive Profile in Autism Spectrum Disorders Diagnosed Late in Life: Implications for the Female Autistic Phenotype	97		2021	Portolese, Joana; Gomes, Catarina S.; Gastaldi, Vinicius Daguano; Paula, Cristiane Silvestre; Caetano, Sheila C.; Bordini, Daniela; Brunoni, Décio; Mari, Jair de Jesus; Vêncio, Ricardo Z. N.; Brentani, Helena	A normative model representing autistic individuals amidst Autism Spectrum Disorders phenotypic heterogeneity	2
		2015	Anderson, G. M., Montazeri, F., & de Bildt, A.	Network Approach to Autistic Traits: Group and Subgroup Analyses of ADOS Item Scores	12		2016	Lombardo, Michael V.; Lai, Meng-Chuan; Auyeung, Bonnie; Holt, Rosemary J.; Allison, Carrie; Smith, Paula; Chakrabarti, Bhismadev; Ruigrok, Amber N. V.; Suckling, John; Bullmore, Edward T.; Bailey, Anthony J.; Baron-Cohen, Simon; Bolton, Patrick F.; Bullmore, Edward T.; Carrington, Sarah; Catani, Marco; Chakrabarti, Bhismadev; Craig, Michael C.; Daly, Eileen M.; Deoni, Sean C. L.; Ecker, Christine…	Unsupervised data-driven stratification of mentalizing heterogeneity in autism	92		2020	Skuse, David; Mandy, William; Tang, Joey	Validating the bidimensional reconceptualisation of the autism phenotype	1
		2015	Obafemi-Ajayi, T., Lam, D., Takahashi, T. N., Kanne, S., & Wunsch, D	Sorting the phenotypic heterogeneity of autism spectrum disorders: A hierarchical clustering model	11		2016	Randall, M., Sciberras, E., Brignell, A., Ihsen, E., Efron, D., Dissanayake, C., & Williams, K.	Autism spectrum disorder: Presentation and prevalence in a nationally representative Australian sample	82		2020	Fóthi, Ábel; Soorya, Latha; Lőrincz, András	The Autism Palette: Combinations of Impairments Explain the Heterogeneity in ASD	0
		2016	Lombardo, Michael V.; Lai, Meng-Chuan; Auyeung, Bonnie; Holt, Rosemary J.; Allison, Carrie; Smith, Paula; Chakrabarti, Bhismadev; Ruigrok, Amber N. V.; Suckling, John; Bullmore, Edward T.; Bailey, Anthony J.; Baron-Cohen, Simon; Bolton, Patrick F.; Bullmore, Edward T.; Carrington, Sarah; Catani, Marco; Chakrabarti, Bhismadev; Craig, Michael C.; Daly, Eileen M.; Deoni, Sean C. L.; Ecker, Christine…	Unsupervised data-driven stratification of mentalizing heterogeneity in autism	92		2016	Becht, A. I., Nelemans, S. A., Branje, S. J., Vollebergh, W. A., Koot, H. M., Denissen, J. J., & Meeus, W. H.	The quest for identity in adolescence: heterogeneity in daily identity formation and psychosocial adjustment across 5 years	81		2020	Johnson, Nikki	The Heterogeneity and Wide Range of Autism Spectrum Disorders	0
		2016	Lehnhardt, Fritz-Georg; Falter, Christine Michaela; Gawronski, Astrid; Pfeiffer, Kathleen; Tepest, Ralf; Franklin, Jeremy; Vogeley, Kai	Sex-Related Cognitive Profile in Autism Spectrum Disorders Diagnosed Late in Life: Implications for the Female Autistic Phenotype	97		2018	Feczko, E., Balba, N. M., Miranda-Dominguez, O., Cordova, M., Karalunas, S. L., Irwin, L., ... & Fair, D. A.	Subtyping cognitive profiles in Autism Spectrum Disorder using a Functional Random Forest algorithm	72		2021	Macari, S. L., Vernetti, A., & Chawarska, K	Attend Less, Fear More: Elevated Distress to Social Threat in Toddlers With Autism Spectrum Disorder	0
		2016	Kim, So Hyun; Macari, Suzanne; Koller, Judah; Chawarska, Katarzyna	Examining the phenotypic heterogeneity of early autism spectrum disorder: subtypes and short-term outcomes	112		2014	Lucas, Rebecca; Norbury, Courtenay Frazier	Levels of Text Comprehension in Children with Autism Spectrum Disorders (ASD): The Influence of Language Phenotype	63		2021	Norcia, A. M., Lee, A., Meredith, W. J., Kohler, P. J., Pei, F., Ghassan, S. A., ... & Hardan, A. Y.	A case–control study of visual, auditory and audio–visual sensory interactions in children with autism spectrum disorder | JOV | ARVO Journals	0
		2016	Pierce, Karen; Marinero, Steven; Hazin, Roxana; McKenna, Benjamin; Barnes, Cynthia Carter; Malige, Ajith	Eye Tracking Reveals Abnormal Visual Preference for Geometric Images as an Early Biomarker of an Autism Spectrum Disorder Subtype Associated With Increased Symptom Severity	210		2014	Ankenman, K., Elgin, J., Sullivan, K., Vincent, L., & Bernier, R.	Nonverbal and Verbal Cognitive Discrepancy Profiles in Autism Spectrum Disorders: Influence of Age and Gender	59
		2016	Bargiela, Sarah; Steward, Robyn; Mandy, William	The Experiences of Late-diagnosed Women with Autism Spectrum Conditions: An Investigation of the Female Autism Phenotype	439		2017	Uljarević, M., Baranek, G., Vivanti, G., Hedley, D., Hudry, K., & Lane, A.	Heterogeneity of sensory features in autism spectrum disorder: Challenges and perspectives for future research	52
		2016	Randall, M., Sciberras, E., Brignell, A., Ihsen, E., Efron, D., Dissanayake, C., & Williams, K.	Autism spectrum disorder: Presentation and prevalence in a nationally representative Australian sample	82		2017	DeBoth, K. K., & Reynolds, S.	A systematic review of sensory-based autism subtypes	48
		2016	Constantino, J. N., & Charman, T.	Diagnosis of autism spectrum disorder: reconciling the syndrome, its diverse origins, and variation in expression	255		2014	McCray, Alexa T.; Trevvett, Philip; Frost, H. Robert	Modeling the Autism Spectrum Disorder Phenotype	44
		2016	Katuwal, G. J., Baum, S. A., Cahill, N. D., & Michael, A. M.	Divide and Conquer: Sub-Grouping of ASD Improves ASD Detection Based on Brain Morphometry	32		2015	Tager-Flusberg, Helen	Defining language impairments in a subgroup of children with autism spectrum disorder	38
		2016	Becht, A. I., Nelemans, S. A., Branje, S. J., Vollebergh, W. A., Koot, H. M., Denissen, J. J., & Meeus, W. H.	The quest for identity in adolescence: heterogeneity in daily identity formation and psychosocial adjustment across 5 years	81		2018	Allely, Clare Sarah	Understanding and recognising the female phenotype of autism spectrum disorder and the “camouflage” hypothesis: a systematic PRISMA review	37
		2017	Boutrus, Maryam; Maybery, Murray T.; Alvares, Gail A.; Tan, Diana Weiting; Varcin, Kandice J.; Whitehouse, Andrew J. O.	Investigating facial phenotype in autism spectrum conditions: The importance of a hypothesis driven approach	10		2016	Katuwal, G. J., Baum, S. A., Cahill, N. D., & Michael, A. M.	Divide and Conquer: Sub-Grouping of ASD Improves ASD Detection Based on Brain Morphometry	32
		2017	Shogren, Karrie A.; Shaw, Leslie A.; Wehmeyer, Michael L.; Thompson, James R.; Lang, Kyle M.; Tassé, Marc J.; Schalock, Robert L.	The Support Needs of Children with Intellectual Disability and Autism: Implications for Supports Planning and Subgroup Classification	19		2018	Tomchek, S. D., Little, L. M., Myers, J., & Dunn, W.	Sensory Subtypes in Preschool Aged Children with Autism Spectrum Disorder	26
		2017	Masi, Anne; DeMayo, Marilena M.; Glozier, Nicholas; Guastella, Adam J.	An Overview of Autism Spectrum Disorder, Heterogeneity and Treatment Options	401		2018	Kim, Hyunsik; Keifer, Cara; Rodriguez-Seijas, Craig; Eaton, Nicholas; Lerner, Matthew; Gadow, Kenneth	Quantifying the Optimal Structure of the Autism Phenotype: A Comprehensive Comparison of Dimensional, Categorical, and Hybrid Models	22
		2017	Klopper, F., Testa, R., Pantelis, C., & Skafidas, E.	A cluster analysis exploration of autism spectrum disorder subgroups in children without intellectual disability	21		2017	Klopper, F., Testa, R., Pantelis, C., & Skafidas, E.	A cluster analysis exploration of autism spectrum disorder subgroups in children without intellectual disability	21
		2017	DeBoth, K. K., & Reynolds, S.	A systematic review of sensory-based autism subtypes	48		2017	Wiggins, L. D., Tian, L. H., Levy, S. E., Rice, C., Lee, L. C., Schieve, L., ... & Thompson, W.	Homogeneous Subgroups of Young Children with Autism Improve Phenotypic Characterization in the Study to Explore Early Development	21
		2017	Uljarević, M., Baranek, G., Vivanti, G., Hedley, D., Hudry, K., & Lane, A.	Heterogeneity of sensory features in autism spectrum disorder: Challenges and perspectives for future research	52		2017	Shogren, Karrie A.; Shaw, Leslie A.; Wehmeyer, Michael L.; Thompson, James R.; Lang, Kyle M.; Tassé, Marc J.; Schalock, Robert L.	The Support Needs of Children with Intellectual Disability and Autism: Implications for Supports Planning and Subgroup Classification	19
		2017	Wiggins, L. D., Tian, L. H., Levy, S. E., Rice, C., Lee, L. C., Schieve, L., ... & Thompson, W.	Homogeneous Subgroups of Young Children with Autism Improve Phenotypic Characterization in the Study to Explore Early Development	21		2015	Anderson, G. M., Montazeri, F., & de Bildt, A.	Network Approach to Autistic Traits: Group and Subgroup Analyses of ADOS Item Scores	12
		2017	Haslbeck, J. M. B., & Fried, E. I.	How predictable are symptoms in psychopathological networks? A reanalysis of 18 published datasets	137		2015	Obafemi-Ajayi, Tayo; Lam, Dao; Takahashi, T. Nicole; Kanne, Stephen; Wunsch, Donald	Sorting the phenotypic heterogeneity of autism spectrum disorders: A hierarchical clustering model	11
		2018	Megremi, Amalia S. F.	An “Abundance” Phenotype Hypothesis for Autism	0		2015	Obafemi-Ajayi, T., Lam, D., Takahashi, T. N., Kanne, S., & Wunsch, D	Sorting the phenotypic heterogeneity of autism spectrum disorders: A hierarchical clustering model	11
		2018	Boorom, Olivia	The Influence of Language Phenotype on Predictors of Emergent Literacy in Children with an Autism Spectrum Disorder	0		2017	Boutrus, Maryam; Maybery, Murray T.; Alvares, Gail A.; Tan, Diana Weiting; Varcin, Kandice J.; Whitehouse, Andrew J. O.	Investigating facial phenotype in autism spectrum conditions: The importance of a hypothesis driven approach	10
		2018	Lorincz, Andras	Colors of Autism Spectrum: A Single Paradigm Explains the Heterogeneity in Autism Spectrum Disorder	1		2015	Kotsopoulos, S	[Early diagnosis of autism: Phenotype-endophenotype]	6
		2018	Whyatt, Caroline	The Autism Phenotype: Physiology versus Psychology?	2		2018	Morales-Hidalgo, Paula; Ferrando, Pere J.; Canals, Josefa	Assessing the heterogeneity of autism spectrum symptoms in a school population	6
		2018	Zou, Mingyang; Sun, Caihong; Wang, Jia; Kang, Jing; Xu, Zhanbin; Ma, Yongjuan; Chen, Lei; Zhang, Xinxi; Xia, Wei; Wu, Lijie	Factors influencing the severity of behavioral phenotype in autism spectrum disorders: Implications for research	3		2018	Paskov, Kelley M.; Wall, Dennis P.	A Low Rank Model for Phenotype Imputation in Autism Spectrum Disorder	6
		2018	Morales-Hidalgo, Paula; Ferrando, Pere J.; Canals, Josefa	Assessing the heterogeneity of autism spectrum symptoms in a school population	6		2018	Zou, Mingyang; Sun, Caihong; Wang, Jia; Kang, Jing; Xu, Zhanbin; Ma, Yongjuan; Chen, Lei; Zhang, Xinxi; Xia, Wei; Wu, Lijie	Factors influencing the severity of behavioral phenotype in autism spectrum disorders: Implications for research	3
		2018	Paskov, Kelley M.; Wall, Dennis P.	A Low Rank Model for Phenotype Imputation in Autism Spectrum Disorder	6		2014	Hu, Valerie W.	Phenotype Definition: A Cornerstone of Autism Research, Diagnosis and Therapy	2
		2018	Kim, Hyunsik; Keifer, Cara; Rodriguez-Seijas, Craig; Eaton, Nicholas; Lerner, Matthew; Gadow, Kenneth	Quantifying the Optimal Structure of the Autism Phenotype: A Comprehensive Comparison of Dimensional, Categorical, and Hybrid Models	22		2018	Whyatt, Caroline	The Autism Phenotype: Physiology versus Psychology?	2
		2018	Allely, Clare Sarah	Understanding and recognising the female phenotype of autism spectrum disorder and the “camouflage” hypothesis: a systematic PRISMA review	37		2018	Lorincz, Andras	Colors of Autism Spectrum: A Single Paradigm Explains the Heterogeneity in Autism Spectrum Disorder	1
		2018	Tomchek, S. D., Little, L. M., Myers, J., & Dunn, W.	Sensory Subtypes in Preschool Aged Children with Autism Spectrum Disorder	26		2018	Megremi, Amalia S. F.	An “Abundance” Phenotype Hypothesis for Autism	0
		2018	Feczko, E., Balba, N. M., Miranda-Dominguez, O., Cordova, M., Karalunas, S. L., Irwin, L., ... & Fair, D. A.	Subtyping cognitive profiles in Autism Spectrum Disorder using a Functional Random Forest algorithm	72		2018	Boorom, Olivia	The Influence of Language Phenotype on Predictors of Emergent Literacy in Children with an Autism Spectrum Disorder	0
		2019	Hikmiah, Ziadatul	Heterogeneity in Anxiety Disorder and Autism Spectrum Disorder: Difference and Overlap	0		2019	Lombardo, Michael V.; Lai, Meng-Chuan; Baron-Cohen, Simon	Big data approaches to decomposing heterogeneity across the autism spectrum	155
		2019	Castro, Susan V. H.	A Kantian Theory of the Sensory Processing Subtype of ASD [Autism Spectrum Disorder]	0		2019	Pierce, Karen; Gazestani, Vahid H.; Bacon, Elizabeth; Barnes, Cynthia Carter; Cha, Debra; Nalabolu, Srinivasa; Lopez, Linda; Moore, Adrienne; Pence-Stophaeros, Sunny; Courchesne, Eric	Evaluation of the Diagnostic Stability of the Early Autism Spectrum Disorder Phenotype in the General Population Starting at 12 Months	115
		2019	Williams, Zachary J.	A bifactor model of the autism spectrum disorder phenotype	1		2019	Feczko, E., Miranda-Dominguez, O., Marr, M., Graham, A. M., Nigg, J. T., & Fair, D. A.	The Heterogeneity Problem: Approaches to Identify Psychiatric Subtypes	86
		2019	Allely, Clare	Exploring the female autism phenotype of repetitive behaviours and restricted interests (RBRIs): a systematic PRISMA review	4		2019	Wolfers, Thomas; Floris, Dorothea L.; Dinga, Richard; van Rooij, Daan; Isakoglou, Christina; Kia, Seyed Mostafa; Zabihi, Mariam; Llera, Alberto; Chowdanayaka, Rajanikanth; Kumar, Vinod J.; Peng, Han; Laidi, Charles; Batalle, Dafnis; Dimitrova, Ralica; Charman, Tony; Loth, Eva; Lai, Meng-Chuan; Jones, Emily; Baumeister, Sarah; Moessnang, Carolin; Banaschewski, Tobias; Ecker, Christine; Dumas, Guil…	From pattern classification to stratification: towards conceptualizing the heterogeneity of Autism Spectrum Disorder	36
		2019	Hassan, Mariam M.; Mokhtar, Hoda M. O.	Investigating autism etiology and heterogeneity by decision tree algorithm	6		2019	Stevens, E., Dixon, D. R., Novack, M. N., Granpeesheh, D., Smith, T., & Linstead, E.	Identification and analysis of behavioral phenotypes in autism spectrum disorder via unsupervised machine learning	27
		2019	Chen, Lang; Abrams, Daniel A.; Rosenberg-Lee, Miriam; Iuculano, Teresa; Wakeman, Holly N.; Prathap, Sandhya; Chen, Tianwen; Menon, Vinod	Quantitative Analysis of Heterogeneity in Academic Achievement of Children With Autism	12		2019	Boorse, Jaclin; Cola, Meredith; Plate, Samantha; Yankowitz, Lisa; Pandey, Juhi; Schultz, Robert T.; Parish-Morris, Julia	Linguistic markers of autism in girls: evidence of a “blended phenotype” during storytelling	24
		2019	Lombardo, Michael V; Eyler, Lisa; Moore, Adrienne; Datko, Michael; Carter Barnes, Cynthia; Cha, Debra; Courchesne, Eric; Pierce, Karen	Default mode-visual network hypoconnectivity in an autism subtype with pronounced social visual engagement difficulties	13		2019	Kim, Hyunsik; Keifer, Cara; Rodriguez-Seijas, Craig; Eaton, Nicholas; Lerner, Matthew; Gadow, Kenneth	Quantifying the Optimal Structure of the Autism Phenotype: A Comprehensive Comparison of Dimensional, Categorical, and Hybrid Models	22
		2019	Kim, Hyunsik; Keifer, Cara; Rodriguez-Seijas, Craig; Eaton, Nicholas; Lerner, Matthew; Gadow, Kenneth	Quantifying the Optimal Structure of the Autism Phenotype: A Comprehensive Comparison of Dimensional, Categorical, and Hybrid Models	22		2019	Kim, H., Keifer, C., Rodriguez-Seijas, C., Eaton, N., Lerner, M., & Gadow, K.	Quantifying the optimal structure of the autism phenotype: A comprehensive comparison of dimensional, categorical, and hybrid models	22
		2019	Boorse, Jaclin; Cola, Meredith; Plate, Samantha; Yankowitz, Lisa; Pandey, Juhi; Schultz, Robert T.; Parish-Morris, Julia	Linguistic markers of autism in girls: evidence of a “blended phenotype” during storytelling	24		2019	Russell, K. M., Frost, K. M., & Ingersoll, B.	The relationship between subtypes of repetitive behaviors and anxiety in children with autism spectrum disorder	19
		2019	Wolfers, Thomas; Floris, Dorothea L.; Dinga, Richard; van Rooij, Daan; Isakoglou, Christina; Kia, Seyed Mostafa; Zabihi, Mariam; Llera, Alberto; Chowdanayaka, Rajanikanth; Kumar, Vinod J.; Peng, Han; Laidi, Charles; Batalle, Dafnis; Dimitrova, Ralica; Charman, Tony; Loth, Eva; Lai, Meng-Chuan; Jones, Emily; Baumeister, Sarah; Moessnang, Carolin; Banaschewski, Tobias; Ecker, Christine; Dumas, Guil…	From pattern classification to stratification: towards conceptualizing the heterogeneity of Autism Spectrum Disorder	36		2019	Zheng, L., Grove, R., & Eapen, V.	Spectrum or subtypes? A latent profile analysis of restricted and repetitive behaviours in autism	15
		2019	Pierce, Karen; Gazestani, Vahid H.; Bacon, Elizabeth; Barnes, Cynthia Carter; Cha, Debra; Nalabolu, Srinivasa; Lopez, Linda; Moore, Adrienne; Pence-Stophaeros, Sunny; Courchesne, Eric	Evaluation of the Diagnostic Stability of the Early Autism Spectrum Disorder Phenotype in the General Population Starting at 12 Months	115		2019	Lombardo, Michael V; Eyler, Lisa; Moore, Adrienne; Datko, Michael; Carter Barnes, Cynthia; Cha, Debra; Courchesne, Eric; Pierce, Karen	Default mode-visual network hypoconnectivity in an autism subtype with pronounced social visual engagement difficulties	13
		2019	Lombardo, Michael V.; Lai, Meng-Chuan; Baron-Cohen, Simon	Big data approaches to decomposing heterogeneity across the autism spectrum	155		2019	Chen, Lang; Abrams, Daniel A.; Rosenberg-Lee, Miriam; Iuculano, Teresa; Wakeman, Holly N.; Prathap, Sandhya; Chen, Tianwen; Menon, Vinod	Quantitative Analysis of Heterogeneity in Academic Achievement of Children With Autism	12
		2019	Stevens, E., Dixon, D. R., Novack, M. N., Granpeesheh, D., Smith, T., & Linstead, E.	Identification and analysis of behavioral phenotypes in autism spectrum disorder via unsupervised machine learning	27		2019	Hassan, Mariam M.; Mokhtar, Hoda M. O.	Investigating autism etiology and heterogeneity by decision tree algorithm	6
		2019	Kim, H., Keifer, C., Rodriguez-Seijas, C., Eaton, N., Lerner, M., & Gadow, K.	Quantifying the optimal structure of the autism phenotype: A comprehensive comparison of dimensional, categorical, and hybrid models	22		2019	Allely, Clare	Exploring the female autism phenotype of repetitive behaviours and restricted interests (RBRIs): a systematic PRISMA review	4
		2019	Zheng, L., Grove, R., & Eapen, V.	Spectrum or subtypes? A latent profile analysis of restricted and repetitive behaviours in autism	15		2019	Williams, Zachary J.	A bifactor model of the autism spectrum disorder phenotype	1
		2019	Feczko, E., Miranda-Dominguez, O., Marr, M., Graham, A. M., Nigg, J. T., & Fair, D. A.	The Heterogeneity Problem: Approaches to Identify Psychiatric Subtypes	86		2019	Hikmiah, Ziadatul	Heterogeneity in Anxiety Disorder and Autism Spectrum Disorder: Difference and Overlap	0
		2019	Russell, K. M., Frost, K. M., & Ingersoll, B.	The relationship between subtypes of repetitive behaviors and anxiety in children with autism spectrum disorder	19		2019	Castro, Susan V. H.	A Kantian Theory of the Sensory Processing Subtype of ASD [Autism Spectrum Disorder]	0
		2020	Johnson, Nikki	The Heterogeneity and Wide Range of Autism Spectrum Disorders	0		2020	Mottron, Laurent; Bzdok, Danilo	Autism spectrum heterogeneity: fact or artifact?	46
		2020	Skuse, David; Mandy, William; Tang, Joey	Validating the bidimensional reconceptualisation of the autism phenotype	1		2020	Tang, Siyi; Sun, Nanbo; Floris, Dorothea L.; Zhang, Xiuming; Di Martino, Adriana; Yeo, B. T. Thomas	Reconciling Dimensional and Categorical Models of Autism Heterogeneity: A Brain Connectomics and Behavioral Study	30
		2020	Uljarević, Mirko; Cooper, Matthew N.; Bebbington, Keely; Glasson, Emma J.; Maybery, Murray T.; Varcin, Kandice; Alvares, Gail A.; Wray, John; Leekam, Susan R.; Whitehouse, Andrew J. O.	Deconstructing the repetitive behaviour phenotype in autism spectrum disorder through a large population-based analysis	3		2020	Tang, S., Sun, N., Floris, D. L., Zhang, X., Di Martino, A., & Yeo, B. T.	Reconciling Dimensional and Categorical Models of Autism Heterogeneity: A Brain Connectomics and Behavioral Study	30
		2020	Tillmann, J.; Uljarevic, M.; Crawley, D.; Dumas, G.; Loth, E.; Murphy, D.; Buitelaar, J.; Charman, T.; Ahmad, Jumana; Ambrosino, Sara; Auyeung, Bonnie; Baumeister, Sarah; Beckmann, Christian; Bourgeron, Thomas; Bours, Carsten; Brammer, Michael; Brandeis, Daniel; Brogna, Claudia; de Bruijn, Yvette; Chakrabarti, Bhismadev; Cornelissen, Ineke; Acqua, Flavio Dell’; Dumas, Guillaume; Ecker, Christine;…	Dissecting the phenotypic heterogeneity in sensory features in autism spectrum disorder: a factor mixture modelling approach	5		2020	Kang, Erin; Gadow, Kenneth D.; Lerner, Matthew D.	Atypical Communication Characteristics, Differential Diagnosis, and the Autism Spectrum Disorder Phenotype in Youth	12
		2020	Narita, Akira; Nagai, Masato; Mizuno, Satoshi; Ogishima, Soichi; Tamiya, Gen; Ueki, Masao; Sakurai, Rieko; Makino, Satoshi; Obara, Taku; Ishikuro, Mami; Yamanaka, Chizuru; Matsubara, Hiroko; Kuniyoshi, Yasutaka; Murakami, Keiko; Ueno, Fumihiko; Noda, Aoi; Kobayashi, Tomoko; Kobayashi, Mika; Usuzaki, Takuma; Ohseto, Hisashi; Hozawa, Atsushi; Kikuya, Masahiro; Metoki, Hirohito; Kure, Shigeo; Kuriya…	Clustering by phenotype and genome-wide association study in autism	5		2020	McCormick, Carolyn E. B.; Kavanaugh, Brian C.; Sipsock, Danielle; Righi, Giulia; Oberman, Lindsay M.; Luca, Daniel Moreno De; Uzun, Ece D. Gamsiz; Best, Carrie R.; Jerskey, Beth A.; Quinn, Joanne G.; Jewel, Susan B.; Wu, Pei-Chi; McLean, Rebecca L.; Levine, Todd P.; Tokadjian, Hasmik; Perkins, Kayla A.; Clarke, Elaine B.; Dunn, Brittany; Gerber, Alan H.; Tenenbaum, Elena J.; Anders, Thomas F.; Sh…	Autism Heterogeneity in a Densely Sampled U.S. Population: Results From the First 1,000 Participants in the RI-CART Study	10
		2020	McCormick, Carolyn E. B.; Kavanaugh, Brian C.; Sipsock, Danielle; Righi, Giulia; Oberman, Lindsay M.; Luca, Daniel Moreno De; Uzun, Ece D. Gamsiz; Best, Carrie R.; Jerskey, Beth A.; Quinn, Joanne G.; Jewel, Susan B.; Wu, Pei-Chi; McLean, Rebecca L.; Levine, Todd P.; Tokadjian, Hasmik; Perkins, Kayla A.; Clarke, Elaine B.; Dunn, Brittany; Gerber, Alan H.; Tenenbaum, Elena J.; Anders, Thomas F.; Sh…	Autism Heterogeneity in a Densely Sampled U.S. Population: Results From the First 1,000 Participants in the RI-CART Study	10		2020	Baadel, S., Thabtah, F., & Lu, J.	A clustering approach for autistic trait classification	8
		2020	Kang, Erin; Gadow, Kenneth D.; Lerner, Matthew D.	Atypical Communication Characteristics, Differential Diagnosis, and the Autism Spectrum Disorder Phenotype in Youth	12		2020	Uljarević, M., Phillips, J. M., Schuck, R. K., Schapp, S., Solomon, E. M., Salzman, E., ... & Hardan, A. Y.	Exploring Social Subtypes in Autism Spectrum Disorder: A Preliminary Study	6
		2020	Tang, Siyi; Sun, Nanbo; Floris, Dorothea L.; Zhang, Xiuming; Di Martino, Adriana; Yeo, B. T. Thomas	Reconciling Dimensional and Categorical Models of Autism Heterogeneity: A Brain Connectomics and Behavioral Study	30		2020	Tillmann, J.; Uljarevic, M.; Crawley, D.; Dumas, G.; Loth, E.; Murphy, D.; Buitelaar, J.; Charman, T.; Ahmad, Jumana; Ambrosino, Sara; Auyeung, Bonnie; Baumeister, Sarah; Beckmann, Christian; Bourgeron, Thomas; Bours, Carsten; Brammer, Michael; Brandeis, Daniel; Brogna, Claudia; de Bruijn, Yvette; Chakrabarti, Bhismadev; Cornelissen, Ineke; Acqua, Flavio Dell’; Dumas, Guillaume; Ecker, Christine;…	Dissecting the phenotypic heterogeneity in sensory features in autism spectrum disorder: a factor mixture modelling approach	5
		2020	Mottron, Laurent; Bzdok, Danilo	Autism spectrum heterogeneity: fact or artifact?	46		2020	Narita, Akira; Nagai, Masato; Mizuno, Satoshi; Ogishima, Soichi; Tamiya, Gen; Ueki, Masao; Sakurai, Rieko; Makino, Satoshi; Obara, Taku; Ishikuro, Mami; Yamanaka, Chizuru; Matsubara, Hiroko; Kuniyoshi, Yasutaka; Murakami, Keiko; Ueno, Fumihiko; Noda, Aoi; Kobayashi, Tomoko; Kobayashi, Mika; Usuzaki, Takuma; Ohseto, Hisashi; Hozawa, Atsushi; Kikuya, Masahiro; Metoki, Hirohito; Kure, Shigeo; Kuriya…	Clustering by phenotype and genome-wide association study in autism	5
		2020	Baadel, S., Thabtah, F., & Lu, J.	A clustering approach for autistic trait classification	8		2020	Uljarević, Mirko; Cooper, Matthew N.; Bebbington, Keely; Glasson, Emma J.; Maybery, Murray T.; Varcin, Kandice; Alvares, Gail A.; Wray, John; Leekam, Susan R.; Whitehouse, Andrew J. O.	Deconstructing the repetitive behaviour phenotype in autism spectrum disorder through a large population-based analysis	3
		2020	Uljarević, M., Phillips, J. M., Schuck, R. K., Schapp, S., Solomon, E. M., Salzman, E., ... & Hardan, A. Y.	Exploring Social Subtypes in Autism Spectrum Disorder: A Preliminary Study	6		2021	Geurts, Hilde M.; Rentergem, Joost A. Agelink van; Radhoe, Tulsi; Torenvliet, Carolien; Putten, Wikke J. Van der; Groenman, Annabeth P.	Ageing and heterogeneity regarding autism spectrum conditions: a protocol paper of an accelerated longitudinal study	2
		2020	Tang, S., Sun, N., Floris, D. L., Zhang, X., Di Martino, A., & Yeo, B. T.	Reconciling Dimensional and Categorical Models of Autism Heterogeneity: A Brain Connectomics and Behavioral Study	30		2021	Portolese, Joana; Gomes, Catarina S.; Gastaldi, Vinicius Daguano; Paula, Cristiane Silvestre; Caetano, Sheila C.; Bordini, Daniela; Brunoni, Décio; Mari, Jair de Jesus; Vêncio, Ricardo Z. N.; Brentani, Helena	A normative model representing autistic individuals amidst Autism Spectrum Disorders phenotypic heterogeneity	2
		2020	Fóthi, Á., Soorya, L., & Lőrincz, A.	The autism palette: Combinations of impairments explain the heterogeneity in ASD	0		2020	Skuse, David; Mandy, William; Tang, Joey	Validating the bidimensional reconceptualisation of the autism phenotype	1
		2021	Geurts, Hilde M.; Rentergem, Joost A. Agelink van; Radhoe, Tulsi; Torenvliet, Carolien; Putten, Wikke J. Van der; Groenman, Annabeth P.	Ageing and heterogeneity regarding autism spectrum conditions: a protocol paper of an accelerated longitudinal study	2		2020	Fóthi, Ábel; Soorya, Latha; Lőrincz, András	The Autism Palette: Combinations of Impairments Explain the Heterogeneity in ASD	0
		2021	Portolese, Joana; Gomes, Catarina S.; Gastaldi, Vinicius Daguano; Paula, Cristiane Silvestre; Caetano, Sheila C.; Bordini, Daniela; Brunoni, Décio; Mari, Jair de Jesus; Vêncio, Ricardo Z. N.; Brentani, Helena	A normative model representing autistic individuals amidst Autism Spectrum Disorders phenotypic heterogeneity	2		2020	Johnson, Nikki	The Heterogeneity and Wide Range of Autism Spectrum Disorders	0
		2021	Macari, S. L., Vernetti, A., & Chawarska, K	Attend Less, Fear More: Elevated Distress to Social Threat in Toddlers With Autism Spectrum Disorder	0		2021	Macari, S. L., Vernetti, A., & Chawarska, K	Attend Less, Fear More: Elevated Distress to Social Threat in Toddlers With Autism Spectrum Disorder	0
		2021	Norcia, A. M., Lee, A., Meredith, W. J., Kohler, P. J., Pei, F., Ghassan, S. A., ... & Hardan, A. Y.	A case–control study of visual, auditory and audio–visual sensory interactions in children with autism spectrum disorder | JOV | ARVO Journals	0		2021	Norcia, A. M., Lee, A., Meredith, W. J., Kohler, P. J., Pei, F., Ghassan, S. A., ... & Hardan, A. Y.	A case–control study of visual, auditory and audio–visual sensory interactions in children with autism spectrum disorder | JOV | ARVO Journals	0

## Sheet: I.A.2.
title of paper	publish date	link	type of paper	model type: case-control / heterogeniety	database size / TD individuals	database size / ASD individuals	database type	age	subgroups found	other results	analysis used	methodes used	Questionnaires used	ADOS / autism	ADI-R / autism	SRS / social	CBCL / behaviour	short sensory profile	Stanford Social Dimensions Scale	VABS / adaptive behaviour	MSEL / cognitive, learning	SCQ / social communication	Wecshler Scales (WISC) / IQ	Florida Apraxia Screening Test (Revised	PANESS / basic motor skills	Child and Adolescent Symptom Inventory-4R (CASI-4R)	DAS-II (Differential Ability Scales—Second Edition) - cognitive abilities	Repetitive Behavior Scale-Revised (RBS-R)	Peabody Picture Vocabulary Test	ClinicalEvaluationofLanguage (CELF)	nr of tests used
Attend Less, Fear More: Elevated Distress to Social Threat in Toddlers With Autism Spectrum Disorder	2020	https://onlinelibrary.wiley.com/doi/abs/10.1002/aur.2448	research	social, case-control	22	42	case-control, 2 sample	22 months		emotional reactivity (ASD >TD), regulation (mixed), and attention (ASD<TD) to social threat; emotional reactivity (ASD<TD), regulation (mixed), and attention (comperable) nonsocial threat in toddlers				+																	1
A case–control study of visual, auditory and audio–visual sensory interactions in children with autism spectrum disorder | JOV | ARVO Journals	2021	https://jov.arvojournals.org/article.aspx?articleid=2772462	research	sensory, case-control	40	34	case-control, 2 sample	7 years old	Children with ASD and ADHD have alterations in visual, auditory, and A/V responses	Children with ASD (n = 34) and ADHD (n = 13) showed a common lack of audio–visual interaction compared to typically developing children (n = 40)	one sided t-test, linear mixed-effects analysis	used frequency-tagged visual and auditory stimulation and high-density electroencephalogram recordings of unimodal and dual-modality responses in a case–control design. To test for the specificity of effects on ASD, we recorded from a smaller group of children with attention-deficit hyperactivity disorder (ADHD), one sided t-test, linear mixed-effects analysis,																			0
A cluster analysis exploration of autism spectrum disorder subgroups in children without intellectual disability	2017	https://www.sciencedirect.com/science/article/abs/pii/S175094671730020X	research	subtypes social and RRB severity	0	61	heterogeneity (with ASD, without ID, 83 % male), 1 sample	5-14 years old	severity based Moderate Social Impairment subgroup: less severe social interaction and communication impairments but greater severity of restricted/repetitive behaviours. Severe Social Impairment subgroup, with poorer social interaction and communication skills, had lower lifetime severity of restricted/repetitive behaviours. This subgroup also had greater cognitive and language difficulties, and…		hierarchical agglomerative clustering, complete linkage cluster analysis.		DSM-IV, V	+	+								+							+	4
A clustering approach for autistic trait classification	2020	https://www.tandfonline.com/doi/full/10.1080/17538157.2019.1687482	research	network	0	1875	heterogeneity (individuals between 4–11 years old (248), 12–16 years old (509) and above 16 years (1118) ), 3 subsample in 1 sample	4-18 years old	2 clusters	improve the performance of detecting ASD traits by reducing data dimensionality and eliminating redundancy in the autism datase CATC offers classifiers with higher predictive accuracy, sensitivity, and specificity rates than those of other intelligent classification approaches such as Artificial Neural Network (ANN), Random Forest, Random Trees, and Rule Induction	classification algorithms (RIPPER, PART Random Forest, Random Trees, Networks4Artificial NeuralNetworks)	unsupervised machine learning clustering method. the OMCOKE algorithm which groups all items into two clusters.based on their attribute similarities, based on K-means	ASDTests mobile application																		1
A Dimensional Approach to the Autism Spectrum	2014	https://www.cambridge.org/core/journals/cns-spectrums/article/abs/dimensional-approach-to-the-autism-spectrum/152937399CA2602DC527733DBC3C52C6	research	dimensional	---	---	---	---	3 core dimensions of ASD	abstract only																					0
A systematic review of sensory-based autism subtypes	2017	https://www.sciencedirect.com/science/article/abs/pii/S1750946717300181	review	subtypes sensory	0	1643 (30-440)	heterogeneity (83,6% male), 1 sample	5 months-12 years old	3-5 different subgroups, usually based on severity	revirew of 8 articles concerning sensory subtyping, various age groups and assessing tools	Fishers ExactTest ANOVA, hierarchical cluster analysis, Model-based cluster analysis Correlation &multiple regression analyses, OnewayANOVAs with Tukey posthoc tests, Hierarchical agglomerative cluster analysis, Pearson’s correlations, Latent profile analysis		Short and adapted Sensory Profiles, Sensory Experiences Questionnaire, Sensory Processing Assessment					+													3
Autism Heterogeneity in a Densely Sampled U.S. Population: Results From the First 1,000 Participants in the RI‐CART Study	2020	https://www.ncbi.nlm.nih.gov/pmc/articles/PMC7060113/	research	heterogeneity	0	1000	heterogeneity (78% male), 3 subsample in 1 sample	3-21 years old	ASD/ASD inclusive/non-ASD	females are diagnosed later than males, because of better language abilities (RI‐CART Study, representative in US population)	Research Electronic Data Capture tools, chi-square tests and analyses of variance, Linear Regression Analyses	geographic representativeness of the sample, place-of-residence for participants was mapped using ArcGIS software		+		+				+											3
Autism spectrum disorder: Presentation and prevalence in a nationally representative Australian sample	2015	https://journals.sagepub.com/doi/abs/10.1177/0004867415595287	research	case-control, longitudinal	8201	165	case-control, 2 sample	0-10 years old		ASD:n = 107, NonAD: n = 4132 1.cohort, ASD: n = 58, NonASD: n = 4069 in 2. cohort (Longitudinal Study of Australian Children (LSAC), 6 years, 4 assessments, 0-10 years old, 1. cohort from birth, 2. cohort from 4 years old)	unadjusted linear regression analyses		parent report, Strengths and Difficulties Questionnaire (SDQ)										+						+		3
Big data approaches to decomposing heterogeneity across the autism spectrum	2019	https://www.nature.com/articles/s41380-018-0321-0	review	---	---	---	---	---	---	organizing principles to frame research examining multi-level heterogeneity in autism																					0
Brief Report: Further Evidence of Sensory Subtypes in Autism	2020	https://link.springer.com/article/10.1007%2Fs10803-010-1103-y	research	subtypes sensory	0	30	heterogeneity ( 80% male), 1 sample	41-113 months	sensory-based inattentive seeking (SBIS), sensory modulation with movement sensitivity (SMMS) sensory modulation with taste/smell sensitivity (SMTS).	seven domains: Tactile Sensitivity, Taste/Smell Sensitivity, Movement Sensitivity, Under-responsive/Seeks Sensation, Auditory Filtering, Low Energy/Weak, Visual/Auditory Sensitivity	Model-based cluster analysis, Pearson’s correlation, Bayesain Information Criteria (BIC), Oneway ANOVA analyses with post-hoc Tukey tests		Short Sensory Profile					+													1
Classification of Children With Autism Spectrum Disorder by Sensory Subtype: A Case for Sensory-Based Phenotypes	2014	https://onlinelibrary.wiley.com/doi/abs/10.1002/aur.1368	research	subtypes sensory	0	228	heterogeneity, 1 sample	2-10 years old	-sensory adaptive, - taste–smell sensitive, - postural inattentive -generalized sensory difference																						0
Diagnosis of autism spectrum disorder: reconciling the syndrome, its diverse origins, and variation in expression	2015	https://www.thelancet.com/pdfs/journals/laneur/PIIS1474-4422(15)00151-9.pdf	review	diagnostic chriteria of ASD	---	---	---	---	---	the traits and features that characterise autism are continuously—not bimodally—distributed in nature; ASD represents the severe end of a continuous distribution of social communication abilities in the general population				+																	1
Divide and Conquer: Sub-Grouping of ASD Improves ASD Detection Based on Brain Morphometry	2016	https://journals.plos.org/plosone/article?id=10.1371/journal.pone.0153331#sec002	research	case-control	373	361	case-control (all males), 2 sample	---	ABIDE dataset	MRI, brain biomarkers --heterogeneity can be mitigated and classification improved if autism severity (AS), verbal IQ (VIQ) and age are used with morphometric features. the most severely autistic subjects are the most difficult to classify, perhaps because the most severely autistic subjects are the most heterogeneous	Random Forest classifier, Gradient Boosting classifier	SVM: Support Vector Machine; LMT: Logistic Model Trees; LDA: Linear Discriminant Classifier; QDA: Quadratic Discriminant Classifier; NAF: Neighborhood Approximation Forest; RVM: Bayesian Relevance Vector Machine; RF: Random Forest; GBM: Gradient Boosting Machine	Developmental Behaviour Checklist- Primary Carer Version	+									+								3
Do planning and visual integration difficulties underpin motor dysfunction in autism? A kinematic study of young children with autism	2012	https://link.springer.com/article/10.1007%2Fs10803-011-1385-8	research	case-control / subtypes motoric	12	11	case-control (matched on age, gender and performance IQ (PIQ).) 2 samples	---	ASD children do not change movement planning in presence of distruptor	movement task in presence of distructive stimuli	Random effects regression analysis	mean (level) and standard deviation (variability) of each temporal and kinematic variable was calculated	Physical and Neurological Assessment of Subtle Signs, an examination of basic motor skills standardized for children, and (2) a praxis examination that included gestures to command, to imitation, and with tool-use; videotaped	+	+								+	+	+						6
Dyspraxia in autism: association with motor, social, and communicative deficits	2007	https://onlinelibrary.wiley.com/doi/epdf/10.1111/j.1469-8749.2007.00734.x	research	case-control	47	47	case-control (90% males), 2 samples	10 yeras 6 months	Motoric ASD group show significantly poorer praxis than controls (impared skilled gestures)	dyspraxia may be a core feature of autism or a marker of the neurological abnormalities underlying the disorder dyspraxia in autism cannot be entirely accounted for by impairments in basic motor skills, suggesting the presence of additional contributory factors	Hierarchical regression	Hierarchical regression examine the association between basic motor skill performance (i.e. times to complete repetitive limb movements) and praxis performance (total praxis errors)		+		+	+		+												4
Exploring Social Subtypes in Autism Spectrum Disorder: A Preliminary Study	2020	https://onlinelibrary.wiley.com/doi/epdf/10.1002/aur.2294	research -drive/desire to interact -ability to express social communication -ability to percieve and interpret social signs	subtypes social	0	164	heterogeneity (78 % male), 1 sample	3,5-11,5 years old	-5 profiles: socially adaptive; mild; moderate A: social responsiveness problems; moderate B: problems with expressing social communication; severe: worst in all aspects	no diff. in chronological age or gender	Latent Profile Analysis, k-means cluster analysis	Latent Profile Analysis, k-means cluster analysis																			0
Heterogeneity of sensory features in autism spectrum disorder: Challenges and perspectives for future research	2017	https://onlinelibrary.wiley.com/doi/abs/10.1002/aur.1747	review	subtypes sensory	---	---	---	---	---	(a) considering sensory features as dimensional construct; (b) taking an “individual differences” approach; and (c) adopting a comprehensive, multidimensional and multimodal approach				+	+		+			+	+	+									6
Homogeneous Subgroups of Young Children with Autism Improve Phenotypic Characterization in the Study to Explore Early Development	2017	https://www.ncbi.nlm.nih.gov/pmc/articles/PMC5848505/	research	subtypes developemental, motor, language	0	707	heterogeneity, 1 sample	2-5 years old	Class 1: mild language delay with cognitive rigidity Class 2: significant developmental delay with repetitive motor mannerisms Class 3: general developmental delay Class 4: mild language and motor delays with dysregulation	from the SEED database	Latent class analysis (Mplus version 7), Bayesian information criterion (BIC), sample adjusted BIC (SABIC), and Lo-Mende–Rubin likelihood ratio test (LMR-LRT),		none																		0
How predictable are symptoms in psychopathological networks? A reanalysis of 18 published datasets	2017	https://www.cambridge.org/core/journals/psychological-medicine/article/how-predictable-are-symptoms-in-psychopathological-networks-a-reanalysis-of-18-published-datasets/84F1D7F73DB03586ABA48783419FE62A	review	network	0	(size: 69-9282)	review of 25 different database	---	predictability: the degree to which a given node can be predicted by all other nodes in the network Predictability was unrelated to sample size, moderately high in most symptom networks, and differed considerable both within and between datasets. Predictability was higher in community than clinical samples, highest for mood and anxiety disorders, and lowest for psychosis	low predictability week connection to other traits in network OR low variance: the symptom rarely appears --> symptoms are largely influenced by additional variables (e.g. biological, environmental or additional symptoms) that are not included in the network high predictability strong connection to other traits (co-occuring/cause and effect) OR overlapping symptoms if predictability is high, th…	Gaussian Graphical Models (GGMs), IsingFit package, neighborhood regression approach	freely available software (see Haslbeck & Waldorp, 2016a // Gaussian Graphical Models (GGMs) using the qgraph package (Epskamp et al. 2012) // Ising models using the IsingFit package (van Borkulo et al.2014), and the parameters for relative importance networks using the relaimpo package (Grömping, 2006,2007); fitted GGMs to the continuous datasets and Ising models to the binary datasets; computed…	DSM-V																		1
Identification and analysis of behavioral phenotypes in autism spectrum disorder via unsupervised machine learning	2019	https://www.sciencedirect.com/science/article/pii/S1386505618308669	research	network	0	2400	heterogeneity ( 81% male)	18 months-12 years old	2 overlying phenotypes / 16 subgroups - from "high functioning " to "low functioning"	. Low-level analysis of ASD behavioral phenotypes based on 8 dimensions of skills • Use of unsupervised machine learning to detect behavioral profiles, and relationship between them, on large (N=2400) sample size • Analysis of response to treatment across behavioral clusters	Gaussian Mixture Model (GMM), Bayesian Information Criterion (BIC), linear regression model, hierarchical agglomerative clustering (HAC).																				0
Network Approach to Autistic Traits: Group and Subgroup Analyses of ADOS Item Scores	2015	https://link.springer.com/article/10.1007/s10803-015-2537-z	research	network	0	477	heterogeneity , 1 sample	---	The five subgroupings were formed either by definition (sex, seizure status, ASD/ID) or by splitting at the means (10 years of age and at a functioning level of 3.82)	can be reproduced on SFARI data cytoscape graphs of traits compared for male versus female, high- versus low-functioning, seizure versus non-seizure, autism spectrum disorder versus intellectual disability, and younger versus older subjects,	Spearman correlation, cytoscape network	Calculation of correlation matrices was done with R version 3.1.2. Partial correlations matrices (for subgroup comparison networks) were computed in PASW Statistics 18 and imported to R. An R script converted this input to node and edge tables for Cytoscape Cytoscape: 14 ADOS items were represented as nodes, and edges (links) represented Spearman correlation between items		+	+					+			+								4
Nonverbal and Verbal Cognitive Discrepancy Profiles in Autism Spectrum Disorders: Influence of Age and Gender	2014	https://pubmed.ncbi.nlm.nih.gov/24450323/	research	subtypes IQ age genrder	0	1954	heterogeneity (87% male), 1 sample	4-18 years old	IQ discrepancy: difference between VIQ and NVIQ (at least 14-16 points) 3 groups: VIQ>NVIQ (14 %), NVIQ>VIQ (27 %)-more than expected, no discrepancies (59 %) gender: females had roughly equal numbers of NVIQ> VIQ and VIQ>NVIQ split males had the NVIQ>VIQ profile more often age: younger children have NVIQ>VIQ more often than expected older children have VIQ>NVIQ more often than expected	1,954 children (1,710 males, 244 females) with ASD between the ages of 4 years and 17 years, 11 months old (mean age 5 8.8 years) from the Simons Simplex Collection (SSC).	mean value, SD, one way ANOVA, Tukey post-hoc comparison, multivariate analysis of covariance			+	+												+				3
Prevalence of autism spectrum disorder among children aged 8 years - autism and developmental disabilities monitoring network, 11 sites, United States, 2010	2010	https://stacks.cdc.gov/view/cdc/22182	research	case-control / searching for ASD cases	4431	5338	case-control, 2 samples	8 years old	ASD prevalence also was 4–5 times higher among boys than girls, ASD prevalence when stratified by geographic area, sex, race/ethnicity, and level of intellectual ability.	found 5338 ASD cases; overall prevalence of ASD among the ADDM (Autism and Developmental Disabilities Monitoring) sites was 1,47% (14.7 per 1,000); do not provide a representative sample of the entire United States	Pearson chi-square tests, one-way analysis of variance (ANOVA)																				0
Quantifying the optimal structure of the autism phenotype: A comprehensive comparison of dimensional, categorical, and hybrid models	2018	https://www.sciencedirect.com/science/article/abs/pii/S089085671831894X	review	case-control/ heterogeneity	2503	3825	case-control, 2 samples	6-22 years old	---	the ASD symptom phenotype is best conceptualized as multidimensional versus a categorical or categorical_x0002_dimensional hybrid construct. ASD symptoms were best characterized as falling along three dimensions (ie, social interaction, communication, and repetitive behavior) on the CASI-4R best fitting model was a three-factor CFA, specifying SI, COM, and RRB factors, where the item difficult “e…	latent class analyses (categorical model), exploratory and confirmatory factor analyses (dimensional models), exploratory factor mixture analysis, exploratory latent class analysis (hibrid analyses), Bayesian information criterion (BIC),	compare 44 methodes. E.g. latent class analyses, exploratory and confirmatory factor analyses, and factor mixture analyses														+					1
Reconciling Dimensional and Categorical Models of Autism Heterogeneity: A Brain Connectomics and Behavioral Study	2020	https://www.sciencedirect.com/science/article/pii/S0006322319318591	research	case-control, dimensional	348	306	case-control, 2 samples	5-52 years old	multiple abnormal RSFC(resting-state functional connectivity) patterns as factors - Factor 1 was associated with core ASD symptoms. Factors 1 and 2 were associated with distinct comorbid symptoms. Older male participants preferentially expressed factor 3. Factors were robust across control analyses and were not associated with IQ or head motion	3 latent ASD factors with dissociable whole-brain hypo- and hyper–RSFC patterns. The factors were associated with distinct behavioral symptoms and demographics	Bayesian model, LFA, canonical correlation analysis (CCA), false discovery rate,	MRI identified latent ASD factors using the Autism Brain Imaging Data Exchange second release and Gender Explorations of Neurogenetics and Development to Advance Autism Research (ABIDEII1GENDAAR) sample.																			0
Sensory Subtypes in Preschool Aged Children with Autism Spectrum Disorder	2018	https://link.springer.com/article/10.1007/s10803-018-3468-2	research	subtypes sensory	0	400	heterogeneity (87% male) 1 sample	3-7 years old	Perceptive-Adaptable subgroup sensorymotor subgroup Vigilant-Engaged subgroup selective-complex subgroup	aspects: sensory processing, social–communication skill, motor performance, and adaptive behavior, see word doc. For details	Latent profile analysis (LPA), Mplus Version 7.0, Bayesian information criterion (BIC), ANOVA with Bonferroni follow up comparisons, LMR: Lo–Mendell–Rubin test, BLRT: bootstrap likelihood ratio test		Short Sensory Profile	+	+			+													3
Sorting the phenotypic heterogeneity of autism spectrum disorders: A hierarchical clustering model	2015	https://ieeexplore.ieee.org/abstract/document/7300337	research	heterogeneity	0	213	heterogeneity, 1 sample	---	2 main clusters split to 5 smaller( +outliers)	ASD children from SSC database	composite distance metric function, Agglomerative hierarchical clustering model	it is suited to work with features of mixed data types i.e. both numerical and categorical.		+	+	+	+												+		5
Spectrum or subtypes? A latent profile analysis of restricted and repetitive behaviours in autism	2019	https://www.sciencedirect.com/science/article/abs/pii/S1750946718301521	research	subtypes RRB	0	2759	heterogeneity, 1 sample	4-18 years old	severity based 3 groups: low, medium and high levels of restricted and repetitive behaviours. groups also differed on problematic behaviours, autistic traits and adaptive behaviours.	three classes did not differ in terms of age or sex Simons Simplex Collection (SSC)	Latent profile analysis, Bayesian Information Criterion, Lo-Mendell- Rubin Likelihood, one-way ANOVA			+	+		+				+	+	+				+	+			8
Subtyping cognitive profiles in Autism Spectrum Disorder using a Functional Random Forest algorithm	2018	https://www.sciencedirect.com/science/article/abs/pii/S1053811917310686	research	subtypes cognitive / control-case study	58	47	case-control, 2 samples	9-13 years old	1.subgroup may have altered visual processing mechanisms, -3. subgroup may have altered attention mechanisms, -2. subgroup may have both	subgroups did not differ on the SRS or the ADOS; no association with age and gender	Functional Random Forest algorithm, Infomap algorithm, one-way ANOVA	Functional Random Forest algorithm // the RF algorithm produces a proximity matrix, //. For the classification model, the Infomap algorithm (Rosvall, 2007) was used to identify putative subgroups from the proximity matrix // For the ASD and the TD samples separately, one-way ANOVAs, with subgroup as the factor and each subgroup a level, were conducted for each task measure. // Functional connecti…		+		+															2
The autism palette: Combinations of impairments explain the heterogeneity in ASD	2020	https://www.ncbi.nlm.nih.gov/pmc/articles/PMC7738611/	review	heterogeneity (palette)	---	---	---	---	impairments as the basic colors of autism, the combinations of diverse impairments make the palette of autism.	hypothesis that autism is caused by deficits in component-based cognition and the internal learning reinforcing machinery, the high dimensionality of sensory information poses serious problems since the brain can handle only 7±2 relevant variables at a time. Impairments in aspects (a) the extraction, (b) the encoding and (c) the capability for the efficient manipulation of the relevant variables,…																					0
The autistic spectrum: a guide for parents and professionals	1975		book	---	---	---	---	---	---	---																					0
The Heterogeneity Problem: Approaches to Identify Psychiatric Subtypes	2019	https://www.sciencedirect.com/science/article/abs/pii/S1364661319300920	review	heterogeneity	---	---	---	---	---	the ‘heterogeneity ‘problem’: different causal mechanisms may relate to the same disorder, and multiple outcomes of interest can occur within one individual overlap between conditions, heterogeneity within conditions, typical samples vary, widely in cognitive ability and intelligence [50]; emotional coping style [51,52]; genetic make-up [53]; and social niche [54–56]; not to mention psychological…	functional random forest (FRF) surrogate variable analysis (SVA);	with explanation!																			0
The quest for identity in adolescence: heterogeneity in daily identity formation and psychosocial adjustment across 5 years	2016	https://psycnet.apa.org/record/2016-56613-003	research	heterogeneity, longitudinal	0	494	heterogeneity, 1 sample	13 years old	---	abstract only	Multivariate latent class growth analyses	Multivariate latent class growth analyses																			0
The relationship between subtypes of repetitive behaviors and anxiety in children with autism spectrum disorder	2019	https://www.sciencedirect.com/science/article/abs/pii/S1750946719300479	research	subtypes RRB	0	2093	heterogeneity, 1 sample	68 months-18 years old	data from Sfari (n:2093) RRB: -insistence on sameness (IS), rituals (1) -compulsive behaviors(2) -circumscribed/restricted interests(3) -self injurious behaviours(repetitive) (4) -stereotypic behaviours (5) assotiaton with anxiety: - (1) - (4) if adaptive skills are high a way of coping with anxiety by attempting to control one’s environment, avoiding disturbing sensory stimuli	no interactions between IQ and any of the RRB factors in predicting anxiety. from the Simons Simplex Collection	hierarchical regression, EFA (exploratory factor analysis) , Pearson correlations	hierarchical regression controlling for age and IQ ., EFA (with principal axis factoring and promax rotation) of the RBS-R to determine which subscales to include, Pearson correlations to examine the relationship between the RRB subtypes, CBCL Anxiety Problem T-score, full scale IQ					+				+		+				+	+			5
														14	8	4	5	3	1	3	3	2	7	1	1	1	3	2	2
review papers
case-control studies
general and/or dimensional studies
subtype-studies

## Sheet: I.B.
analysis name in studies	nr of use in studies	frequency of use in studies	type of test (correlation C / regression R / clustering CL / factoranalysis F / other O	function of test (determine the number of groups G/ determine the number of parameters P/correlation of the variables C / is there any Difference between groups / is there any Relationship between variables)	what is it good for	for what type of variable (nominal N/ordinal O =qualitativ QL or interval I: discrete or continouos=quantitativ or both), under what conditions	how many variables	how many groups	type of sample	size of sample				analysis name in 24 studies	nr of use	frequency of use
Fishers ExactTest	1	0.0416667	R	D/model selection	how cases are distributed (Y) according to a single variable (X)	N	one	2<	fixed size (but usually not considered)	any (prefered for small)				analysis of variance (ANOVA)	8	0.33
Chi squere	1	0.0416667	R	D/model selection	how cases are distributed (Y) according to a single variable (X)	N and/or O	one	2	normal distributed	big				Bayesian Information Criterion (BIC)	6	0.25
(one sided) t-test	1	0.0416667	R	D	compare a dependent variable( at least at interval measurement level)'s average with a certain value (X)	quantitative dependent variable with normal distribution	one	2	normal distributed	big				Pearson’s correlations	4	0.17
analysis of variance (ANOVA) / one-way ANOVA (or multifactor)	8	0.333333	R	D	compare the mean of one or more variable in normally distributed groups with similar standard deviations	X: N/O; y: I	one (or more)	2<	normal distributed	big				Latent class analysis	3	0.13
														Random Forest Algorithm	3	0.13
Bayesian model / Bayesian Information Criterion (BIC) / sample adjusted BIC (SABIC)	6	0.25	F	model selection	selecting most important descriptive variables	any	many	many	nested and nonnested modells as well	much larger than the number of factors				exploratory factor analysis (EFA)	2	0.08
BLRT: bootstrap likelihood ratio test	1	0.0416667	F	model selection	compare two statistical models: which one fits better to the observed data	any	many	many	any distribution	not too small				Gaussian Graphical Models (GGMs)	2	0.08
Lo-Mende–Rubin likelihood ratio test (LMR-LRT),	2	0.0833333	F	model selection	compare two statistical models: which one fits better to the observed data	any	many	many	normal distribution	large				hierarchical agglomerative clustering (HAC).	2	0.08
														Hierarchical regression	2	0.08
canonical correlation analysis	1	0.0416667	C	C	in case of Pearson: measure of interaction linearity between variables; in case of rank correlation: are two variables in the same order on average?	o	2	1	any	small or big				Latent profile analysis	2	0.08
Pearson’s correlations / Pearson chi-square tests	4	0.166667	C	R(statistical model)	is there a linear relationship between two quantitative variables and, if so, how close it is (0: no correlation, I1I: linear correlation)	quantitative	two	1	any	small or big				Linear Regression Analyses	2	0.08
														Lo-Mende–Rubin likelihood ratio test (LMR-LRT),	2	0.08
linear regression model / Linear Regression Analyses	2	0.0833333	R	R(statistical model)	Describes a target variable or a dependent variable as a linear function of an independent variable	quantitative (only the difference between the model and data should be normally distributed in case of traditional hypothesis testing of steepness is different from 0 or not, but bootstrapping can help with nonnormal deviations as well)	1 or more dependent, 1 or more independent	1	any	2<				Model-based cluster analysis	2	0.08
unadjusted linear regression analyses	1	0.0416667	R	R(statistical model)	linear model of one variable depending on single other variable. The regression is adjusted, if the unadjusted regression is repeated with more (confounding) variables. If the coefficient of the variable changes significantly, the confounding variable must be included into the model	quantitative (only the difference between the model and data should be normally distributed in case of traditional hypothesis testing of steepness is different from 0 or not, but bootstrapping can help with nonnormal deviations as well)	1 to 1	1	any	2<				Tukey post-hoc comparison	2	0.08
neighborhood regression approach	1	0.0416667	R	R(statistical model)	selects the most important variables from a large (but not too large) collection from variables that describe or can predict a preselected variable	quantitative (only the difference between the model and data should be normally distributed in case of traditional hypothesis testing of steepness is different from 0 or not, but bootstrapping can help with nonnormal deviations as well)	1 to many	1	any	2<				Bootstrap likelihood ratio test (BLRT)	1	0.04
Correlation &multiple regression analyses	1	0.0416667	C,R	R(statistical model)	same as the linear regression/correlation method, but here a sequence of variables (vector) is the predictor and the dependent variable	quantitative (only the difference between the model and data should be normally distributed in case of traditional hypothesis testing of steepness is different from 0 or not, but bootstrapping can help with nonnormal deviations as well)	many to many	1	any	2<				canonical correlation analysis	1	0.04
Hierarchical regression	2	0.0833333	R	R(statistical model)	This is a model refinement method, where predictor variables are added or removed from the model consequtively. Typically, variables are changed in groups, ie. more than one variables are added or removed. Note: do not confuse this analysis with hierarchical linear modeling, where you have nested data structures. Hierarchical regression deals with independent variables and tries to uncover the mo…	quantitative (only the difference between the model and data should be normally distributed in case of traditional hypothesis testing of steepness is different from 0 or not, but bootstrapping can help with nonnormal deviations as well)	many	1 or more	any	big				complete linkage cluster analysis	1	0.04
Random effects regression analysis	1	0.0416667	R	R(statistical model)	random effects analysis allows variances by individuals, in contrast, fixed effects analysis assumes variances on individuals by pure chance and not by hidden effect. E.g. sampling from several countries and modeling by age is a fixed model, and modeling by country is a random effect model, furthermore a model with age and country is a mixed model.	quantitative (only the difference between the model and data should be normally distributed in case of traditional hypothesis testing of steepness is different from 0 or not, but bootstrapping can help with nonnormal deviations as well)	any	any	any	2<				confirmatory factor analyses	1	0.04
														Correlation &multiple regression analyses	1	0.04
k-means cluster analysis	1	0.0416667	CL	find groups	classify objects into k groups based on geometric distance from the average of the group	interval data (all objects must be embedded into a vector space)	any number, but many is meaningful	determined by the parameter: k	any, which well separates in space	large				exploratory factor mixture analysis	1	0.04
hierarchical agglomerative clustering (HAC).	2	0.0833333	CL	find groups	classify objects into groups based on a similarity measure between objects and objects and similarity between groups and groups. This method generates hierarchical (nested) groups.	any data, for which similarity measure can be defined	any number, but many is meaningful	determined by the optimal similarity or by other contrain where to cut the dendogram	any	large				Fishers ExactTest	1	0.04
Model-based cluster analysis	2	0.0833333	CL	find groups	classify objects into groups, where groups are determined by predefined models and each objects are fitted to the models. The object belongs to that group whose model has the best fit	any	any	predefined by the number of models	any	any				Gradient Boosting classifier	1	0.04
complete linkage cluster analysis	1	0.0416667	CL	find groups	this is one possible implementation of agglomerative hierarchical clustering, where the similarity is measured between groups. In contrast, single linkage clustering uses similarity between the closest objects of the groups. The complete linkage method results in more compact groups than the alternative linkage methods	any data, for which similarity measure can be defined	any number, but many is meaningful	determined by the optimal similarity or by other contrain where to cut the dendogram	any	large				Infomap algorithm	1	0.04
														k-means cluster analysis	1	0.04
EFA (exploratory factor analysis)	2	0.0833333	F	P,C,R	identifies the minimal set of variables and latent variables that explain the measured valiues	i	many	one or more	any	n>nr of variables*5				Latent factor analysis	1	0.04
exploratory factor mixture analysis	1	0.0416667	F	P,C,R	same as EFA, but allows discrete variables as well	discrete and continuous mixed	many	one or more	any	n>nr of variables*5				linear mixed-effects analysis	1	0.04
confirmatory factor analyses	1	0.0416667	F	P,C,R	This is the second step after EFA, or this is step after constructing a model. CFA tests the hypothesis of the factors whether they are really contributing to the variance of the data	i	many	one or more	any	n>nr of variables*5				multivariate analysis of covariance	1	0.04
Latent factor analysis	1	0.0416667	F	P,C,R	same as EFA or CFA, but focuses only on the latent variables and ignores or does not test observed variables	i	many	one or more	any	n>nr of variables*5				Multivariate latent class growth analyses	1	0.04
Latent class analysis / exploratory latent class analysis	3	0.125	F	find groups	Similar to latent factor analysis, but for discrete variables with low number of levels. Typical application is to identify latent (not measured) groups that can explain the observed differences among data	input data: any, output data: nominal with small number of levels	multiple	more	categorical	large				neighborhood regression approach	1	0.04
Multivariate latent class growth analyses	1	0.0416667	F	G,D	It finds homogeneous subgroups of individuals that evolve (grow) in time according to similar rates and have similar starting values. It assumes fixed parameters in contrast to mixture models that allows random variances in the parameters among individuals. The method aims to find groups that have significantly smaller variances within groups compared to variances between groups.	i,o; variables should be available longitudinally, e.g at several times	multiple	more than one but not too many	longitudinal	large				one sided t-test	1	0.04
Latent profile analysis	2	0.0833333	F	G,D	uncovers hidden groups in a population by estimating probabilities of cases belonging to a specific group. In contrast to latent class analysis: in profile analysis the propability is estimated, in class analysis a binary member/non-member is the output.	continuous	multiple	set by the researcher	continouous	large				Random effects regression analysis	1	0.04
linear mixed-effects analysis	1	0.0416667	F	P,C,R	similar to EFA, but allows correlated (not independent) variables	discrete and continuous mixed	many	one or more	any	n>nr of variables*5				unadjusted linear regression analyses	1	0.04
Gaussian Graphical Models (GGMs)	2	0.0833333	O	C, R	general framework for modeling data with partial correlations (special case of it is the neighbourhood regression above)	continuous	many	one or more	normally distributed over the whole population	large
Gradient Boosting classifier	1	0.0416667	o	model selection	it combines several weak classifiers in order to get a strong one	any	many	many	any	large
multivariate analysis of covariance	1	0.0416667	r	D	MANCOVA~multifactor ANOVA + cofactors: tests for significant difference among groups mean levels and takes into account the effect of additional variables (covariates)	continuous	more than one	more than one	independent, normally distributed	any
Random Forest Algorithm /Functional Random Forest algorithm/Random Forest classifier	3	0.125	cl	model selection	ensemble of decision tree classifiers	any	many	many	any	large
Tukey post-hoc comparison	2	0.0833333	cl	~model selection	post-hoc test for ANOVA to find the relevant variable which caused a significant deviation in anova	continuous	any	any	normal	any
